# Supplementary material for: Efficient 2-sulfolmethyl quinoline formation from 2-methylquinolines and sodium sulfinates under transition-metal free conditions
Source: Royal Society of Chemistry journal article supplement (doi:10.1039/c4cc07546c), 2014-11-19

## Supporting Information for

# Efficient 2-Sulfolmethyl Quinoline Formation from 2-Methylquinolines and Sodium Sulfinates under Transition-Metal Free Conditions

Fuhong Xiao,<sup>\*a</sup> Shuqing Chen,<sup>a</sup> Ya Chen,<sup>a</sup> Huawen Huang<sup>a</sup> and Guo-Jun Deng<sup>\*a</sup>

<sup>a</sup> *Key Laboratory of Environmentally Friendly Chemistry and Application of Ministry of Education, College of Chemistry, Xiangtan University, Xiangtan 411105, China; Fax: (+86)-731-58292251; e-mail: 494707822@163.com; gjdeng@xtu.edu.cn*

## Table of Contents

|                                                                |       |
|----------------------------------------------------------------|-------|
| 1. General information                                         | 2     |
| 2. Optimization of reaction conditions                         | 2     |
| 3. Optimization of reaction conditions under oxygen atmosphere | 3     |
| 4. General experimental procedure for the control experiments  | 4     |
| 5. General experimental procedure                              | 4     |
| 6. Characterization data of products                           | 4-14  |
| 7. References                                                  | 14    |
| 8. <sup>1</sup> H and <sup>13</sup> C NMR spectra of products  | 15-37 |

## General information:

All experiments were carried out under an atmosphere of air. Flash column chromatography was performed over silica gel 48-75  $\mu\text{m}$ .  $^1\text{H}$  NMR and  $^{13}\text{C}$  NMR spectra were recorded on Bruker-AV (400 and 100 MHz, respectively) instrument internally referenced to  $\text{SiMe}_4$  or chloroform signals. MS analyses were performed on an Agilent 5975 GC-MS instrument (EI). High-resolution mass spectra were recorded at Institute of Chemistry, Chinese Academy of Sciences. The structures of known compounds were further corroborated by comparing their NMR data and MS data with those of literature. Reagents were used as received or prepared by our laboratory.

## Optimization of reaction conditions

**Table S1.** Optimization of reaction conditions <sup>a</sup>

| <div><div>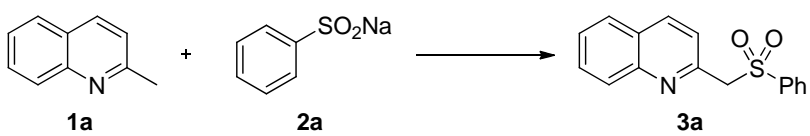<div><div><b>1a</b></div><div><b>2a</b></div><div><b>3a</b></div></div></div></div> |                   |                                              |                 |                        |
|----------------------------------------------------------------------------------------------------------------------------------------------------------------------------------|-------------------|----------------------------------------------|-----------------|------------------------|
| Entry                                                                                                                                                                            | Additives         | Oxidant                                      | Solvent         | Yield <sup>b</sup> [%] |
| 1                                                                                                                                                                                | I <sub>2</sub>    | TBHP                                         | DMSO:AcOH (1:1) | 60                     |
| 2                                                                                                                                                                                | NIS               | TBHP                                         | DMSO:AcOH (1:1) | 32                     |
| 3                                                                                                                                                                                | TBAI              | TBHP                                         | DMSO:AcOH (1:1) | 61                     |
| 4                                                                                                                                                                                | CuI               | TBHP                                         | DMSO:AcOH (1:1) | 23                     |
| 5                                                                                                                                                                                | NaI               | TBHP                                         | DMSO:AcOH (1:1) | 73                     |
| 6                                                                                                                                                                                | NH <sub>4</sub> I | TBHP                                         | DMSO:AcOH (1:1) | 83                     |
| 7                                                                                                                                                                                | KI                | TBHP                                         | DMSO:AcOH (1:1) | 92                     |
| 8                                                                                                                                                                                | KI                | TBP                                          | DMSO:AcOH (1:1) | 55                     |
| 9                                                                                                                                                                                | KI                | Oxone                                        | DMSO:AcOH (1:1) | 53                     |
| 10                                                                                                                                                                               | KI                | K <sub>2</sub> S <sub>2</sub> O <sub>8</sub> | DMSO:AcOH (1:1) | 34                     |
| 11                                                                                                                                                                               | KI                | H <sub>2</sub> O <sub>2</sub>                | DMSO:AcOH (1:1) | 70                     |
| 12                                                                                                                                                                               | KI                | O <sub>2</sub>                               | DMSO:AcOH (1:1) | 62                     |
| 13                                                                                                                                                                               | KI                | TBHP                                         | DMSO            | 1                      |
| 14                                                                                                                                                                               | KI                | TBHP                                         | AcOH            | 46                     |
| 15                                                                                                                                                                               | KI                | TBHP                                         | PhCl            | 2                      |
| 16                                                                                                                                                                               | KI                | TBHP                                         | anisole         | 3                      |
| 17                                                                                                                                                                               | KI                | TBHP                                         | toluene         | 0                      |
| 18                                                                                                                                                                               | KI                | TBHP                                         | DMSO:AcOH (2:1) | 81                     |
| 19                                                                                                                                                                               | KI                | TBHP                                         | DMSO:AcOH (1:2) | 83                     |
| 20 <sup>c</sup>                                                                                                                                                                  | KI                | TBHP                                         | DMSO:AcOH (1:1) | 77                     |
| 21 <sup>d</sup>                                                                                                                                                                  | KI                | TBHP                                         | DMSO:AcOH (1:1) | 84                     |
| 22 <sup>e</sup>                                                                                                                                                                  | KI                | TBHP                                         | DMSO:AcOH (1:1) | 72                     |

<sup>a</sup> Reaction conditions: **1a** (0.5 mmol), **2a** (1.25 mmol), catalyst (0.5 mmol, for I<sub>2</sub> 0.25 mmol), oxidant (0.5 mmol), solvent (1.6 mL), 80 °C, 16 h under air. <sup>b</sup> GC yield based on **1a**. <sup>c</sup> 40 °C. <sup>d</sup> KI (0.25 mmol). <sup>e</sup> 0.25 mmol TBHP.

## Optimization of reaction conditions under oxygen atmosphere

**Table S2.** Optimization of reaction conditions under oxygen atmosphere <sup>a</sup>

| 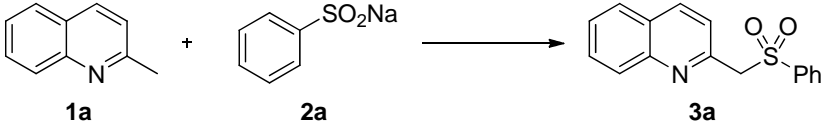 |           |                 |                        |
|------------------------------------------------------------------------------------|-----------|-----------------|------------------------|
| Entry                                                                              | Additives | Solvent         | Yield <sup>b</sup> [%] |
| 1                                                                                  | NIS       | DMSO:AcOH (1:1) | 30                     |
| 2                                                                                  | TBAI      | DMSO:AcOH (1:1) | 45                     |
| 3                                                                                  | CuI       | DMSO:AcOH (1:1) | 20                     |
| 4                                                                                  | KI        | DMSO:AcOH (1:1) | 62                     |
| 5                                                                                  | KI        | DMSO            | 2                      |
| 6                                                                                  | KI        | AcOH            | 3                      |
| 7                                                                                  | KI        | PhCl            | 2                      |
| 8                                                                                  | KI        | anisole         | 3                      |
| 9                                                                                  | KI        | toluene         | 0                      |
| 10                                                                                 | KI        | DMSO:AcOH (2:1) | 42                     |
| 11                                                                                 | KI        | DMSO:AcOH (1:2) | 35                     |
| 12 <sup>c</sup>                                                                    | KI        | DMSO:AcOH (1:1) | 51                     |
| 13 <sup>d</sup>                                                                    | KI        | DMSO:AcOH (1:1) | 80                     |
| 14 <sup>e</sup>                                                                    | KI        | DMSO:AcOH (1:1) | 65                     |

<sup>a</sup> Reaction conditions: **1a** (0.5 mmol), **2a** (1.25 mmol), catalyst (0.5 mmol, for **I<sub>2</sub>** 0.25 mmol), solvent (1.6 mL), 80 °C, 16 h under O<sub>2</sub>. <sup>b</sup> GC yield based on **1a**. <sup>c</sup> 100 °C. <sup>d</sup> TBHP (0.25 mmol). <sup>e</sup> 24 h.

### General procedure for the control experiments:

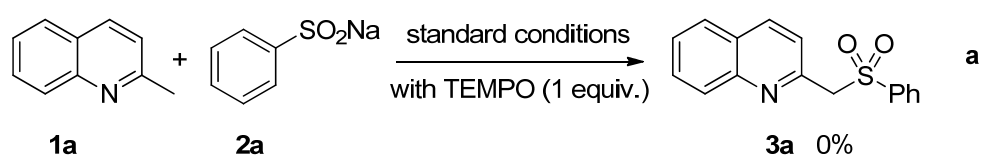

A 10 mL oven-dried reaction vessel was charged with sodium benzenesulfinate (**2a**, 205 mg, 1.25 mmol), KI (83.3 mg, 0.5 mmol), 2, 2, 6, 6-tetramethyl-1-piperidinyloxy (78 mg, 0.5 mmol), 2-methylquinoline (**1a**, 67.5  $\mu$ L, 0.5 mmol), acetic acid (0.8 mL) and DMSO (0.8 mL) under air. Finally TBHP (75  $\mu$ L, 0.5 mmol) was slowly added to the reaction vessel by syringe. The resulting solution was stirred at 80 °C for 16 h, and no desired product **3a** was observed.

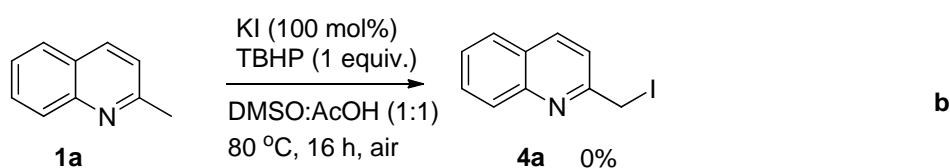

A 10 mL oven-dried reaction vessel was charged with KI (83.3 mg, 0.5 mmol), 2-methylquinoline (**1a**, 67.5  $\mu$ L, 0.5 mmol), acetic acid (0.8 mL) and DMSO (0.8 mL) under air. Finally TBHP (75  $\mu$ L, 0.5 mmol) was slowly added to the reaction vessel by syringe. The resulting solution was stirred at 80 °C for 16 h, and no 2-(iodomethyl)quinoline was observed.

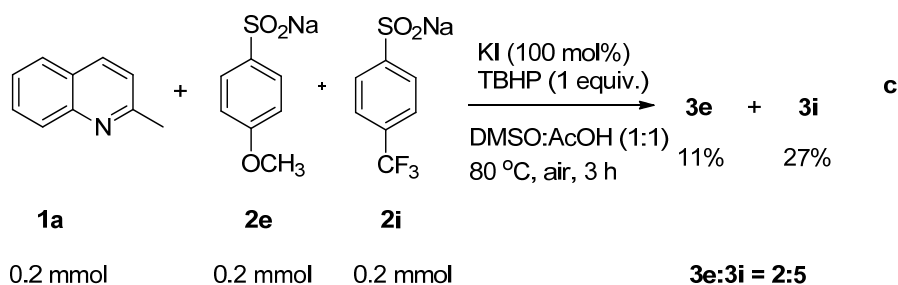

A 10 mL oven-dried reaction vessel was charged with sodium 4-methoxybenzenesulfonate (**2e**, 38.8 mg, 0.2 mmol), sodium 4-(trifluoromethyl)benzenesulfonate (**2i**, 46.4 mg, 0.2 mmol), KI (33.3 mg, 0.2 mmol), 2-methylquinoline (**1a**, 27  $\mu$ L, 0.2 mmol), acetic acid (0.8 mL) and DMSO (0.8 mL) under air. Finally TBHP (30  $\mu$ L, 0.2 mmol) was slowly added to the reaction vessel by syringe. The resulting solution was stirred at 80 °C for 3 h, and C-H sulfenylation products **3e** and **3i** were determined by GC in ratio 1:2.5.

#### General procedure: (**3a**):

A 10 mL oven-dried reaction vessel was charged with sodium benzenesulfonate (**2a**, 205 mg, 1.25 mmol), KI (83.3 mg, 0.5 mmol), 2-methylquinoline (**1a**, 67.5  $\mu$ L, 0.5 mmol), acetic acid (0.8 mL) and DMSO (0.8 mL) under air. Finally TBHP (75  $\mu$ L, 0.5 mmol) was slowly added to the reaction vessel by syringe. The resulting solution was stirred at 80 °C for 16 h. The volatiles were removed under vacuum and the residue was purified by column chromatography (silica gel, petroleum ether/ethyl acetate = 7:1) to give **3a** as white solid; yield: 129.8 mg (92%), mp 122-124 °C.

#### 2-((Phenylsulfonyl)methyl)quinoline (**3a**, CAS: 65492-27-5)<sup>[1]</sup>

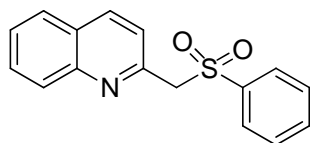

<sup>1</sup>H NMR (CDCl<sub>3</sub>, 400 MHz, ppm):  $\delta$  8.17 (d,  $J$  = 8.4 Hz, 1H), 7.83-7.81 (m, 2H), 7.68-7.66 (m, 3H), 7.60-7.53 (m, 3H), 7.43-7.39 (m, 2H), 4.74 (s, 2H); <sup>13</sup>C NMR (100 MHz, CDCl<sub>3</sub>, ppm):  $\delta$  149.2, 147.7, 138.3, 136.7, 133.7, 129.7, 129.1, 128.8, 128.4, 127.5, 127.2, 127.0, 122.6, 65.2.

**2-(Tosylmethyl)quinoline (3b, CAS: 69722-31-2)<sup>[2]</sup>**

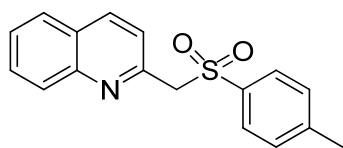

The reaction was conducted with sodium 4-methylbenzenesulfinate (**2b**, 222.5 mg, 1.25 mmol) and 2-methylquinoline (**1a**, 67.5  $\mu$ L, 0.5 mmol). The residue was purified by column chromatography (silica gel, petroleum ether/ethyl acetate = 7:1) to give **3b** as red solid; yield: 148 mg (90%), mp 161.1-162.5 °C.

<sup>1</sup>H NMR (CDCl<sub>3</sub>, 400 MHz, ppm):  $\delta$  8.17 (d,  $J$  = 8.2 Hz, 1H), 7.88-7.81 (m, 2H), 7.68 (t,  $J$  = 7.5 Hz, 1H), 7.60-7.55 (m, 4H), 7.21 (d,  $J$  = 7.4 Hz, 2H), 4.72 (s, 2H), 2.39 (s, 3H); <sup>13</sup>C NMR (100 MHz, CDCl<sub>3</sub>, ppm):  $\delta$  149.3, 147.7, 144.6, 136.6, 135.4, 129.6, 129.4, 129.0, 128.3, 127.4, 127.2, 126.9, 122.5, 65.2, 21.4.

**2-(((4-*iso*-Propylphenyl)sulfonyl)methyl)quinoline (3c)**

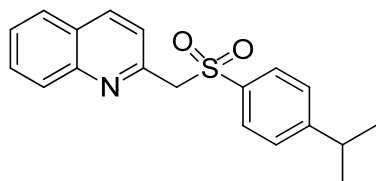

The reaction was conducted with sodium 4-*iso*-propylbenzenesulfinate (**2c**, 257 mg, 1.25 mmol) and 2-methylquinoline (**1a**, 67.5  $\mu$ L, 0.5 mmol). The residue was purified by column chromatography (silica gel, petroleum ether/ethyl acetate = 7:1) to give **3c** as yellow solid; yield: 124 mg (76%), mp 106.4-107.2 °C.

<sup>1</sup>H NMR (CDCl<sub>3</sub>, 400 MHz, ppm):  $\delta$  8.16 (d,  $J$  = 8.4 Hz, 1H), 7.81 (d,  $J$  = 8.4 Hz, 2H), 7.65 (t,  $J$  = 7.6 Hz, 1H), 7.60-7.52 (m, 4H), 7.23 (d,  $J$  = 8.0 Hz, 2H), 4.72 (s, 2H), 2.95-2.88 (m, 1H), 1.22-1.20 (m, 6H); <sup>13</sup>C NMR (CDCl<sub>3</sub>, 100 MHz, ppm):  $\delta$  155.4, 149.4, 147.8, 136.7, 135.5, 129.7, 129.1, 128.6, 127.5, 127.3, 127.0, 126.9, 122.7, 65.3, 34.2, 23.5; HRMS calcd. for: C<sub>19</sub>H<sub>19</sub>NO<sub>2</sub>SNa [M+Na]<sup>+</sup> 348.1028, found 348.1022.

**2-(((4-(*tert*-Butyl)phenyl)sulfonyl)methyl)quinoline (3d)**

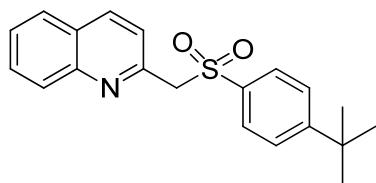

The reaction was conducted with sodium 4-(*tert*-butyl)benzenesulfinate (**2d**, 275 mg, 1.25 mmol) and 2-methylquinoline (**1a**, 67.5  $\mu$ L, 0.5 mmol). The residue was purified by column chromatography (silica gel, petroleum ether/ethyl acetate = 7:1) to give **3d** as red solid; yield: 115.7 mg (68%), mp 151.2-153.4 °C.

$^1\text{H}$  NMR ( $\text{CDCl}_3$ , 400 MHz, ppm):  $\delta$  8.17 (d,  $J$  = 8.4 Hz, 1H), 7.81 (t,  $J$  = 8.3 Hz, 2H), 7.68-7.53 (m, 5H), 7.39 (d,  $J$  = 8.4 Hz, 2H), 4.72 (s, 2H), 1.29 (s, 9H);  $^{13}\text{C}$  NMR (100 MHz,  $\text{CDCl}_3$ , ppm):  $\delta$  157.6, 149.4, 147.8, 136.7, 135.2, 129.6, 129.1, 128.3, 127.5, 127.2, 127.0, 125.8, 122.7, 65.3, 35.1, 30.9; HRMS calcd. for:  $\text{C}_{20}\text{H}_{21}\text{NO}_2\text{SNa}$   $[\text{M}+\text{Na}]^+$  362.1185, found 362.1179.

#### 2-(((4-Methoxyphenyl)sulfonyl)methyl)quinoline (**3e**)

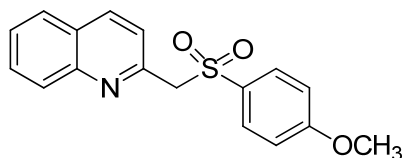

The reaction was conducted with sodium 4-methoxybenzenesulfinate (**2e**, 242.5 mg, 1.25 mmol) and 2-methylquinoline (**1a**, 67.5  $\mu$ L, 0.5 mmol). The residue was purified by column chromatography (silica gel, petroleum ether/ethyl acetate = 7:1) to give **3e** as yellow solid; yield: 142 mg (90%), mp 149.1-150.8 °C.

$^1\text{H}$  NMR ( $\text{CDCl}_3$ , 400 MHz, ppm):  $\delta$  8.17 (d,  $J$  = 8.4 Hz, 1H), 7.88 (d,  $J$  = 8.5 Hz, 1H), 7.82 (d,  $J$  = 8.0 Hz, 1H), 7.70-7.66 (m, 1H), 7.60-7.53 (m, 4H), 6.87-6.83 (m, 2H), 4.72 (s, 2H), 3.81 (s, 3H);  $^{13}\text{C}$  NMR ( $\text{CDCl}_3$ , 100 MHz, ppm):  $\delta$  163.8, 149.5, 147.7, 136.9, 130.7, 129.8, 129.8, 129.1, 127.5, 127.3, 127.1, 122.7, 114.1, 65.4, 55.6; HRMS calcd. for:  $\text{C}_{17}\text{H}_{15}\text{NO}_3\text{SNa}$   $[\text{M}+\text{Na}]^+$  336.0664, found 336.0661.

#### 2-(((4-Fluorophenyl)sulfonyl)methyl)quinoline (**3f**)

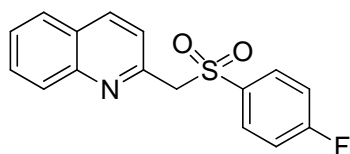

The reaction was conducted with sodium 4-fluorobenzenesulfinate (**2f**, 227.5 mg, 1.25 mmol) and 2-methylquinoline (**1a**, 67.5  $\mu$ L, 0.5 mmol). The residue was purified by column chromatography (silica gel, petroleum ether/ethyl acetate = 7:1) to give **3f** as yellow solid; yield: 100.1 mg (62%), mp 125.8-128.1  $^{\circ}$ C.

$^1\text{H}$  NMR ( $\text{CDCl}_3$ , 400 MHz, ppm):  $\delta$  8.19 (d,  $J$  = 8.2 Hz, 1H), 7.83-7.81 (m, 2H), 7.70-7.55 (m, 5H), 7.07 (t,  $J$  = 8.4 Hz, 2H), 4.74 (s, 2H);  $^{13}\text{C}$  NMR (100 MHz,  $\text{CDCl}_3$ , ppm):  $\delta$  166.9 ( $J$  = 255 Hz), 149.3, 147.9, 136.9, 131.5, 131.4, 130.0, 129.2, 127.6, 127.4, 127.2, 122.7, 116.1 ( $J$  = 22.6 Hz), 65.4; HRMS calcd. for:  $\text{C}_{16}\text{H}_{13}\text{FNO}_2\text{S}$   $[\text{M}+\text{H}]^+$  302.0645, found 302.0646.

### 2-(((4-Chlorophenyl)sulfonyl)methyl)quinoline (**3g**)<sup>[3]</sup>

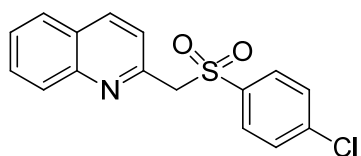

The reaction was conducted with sodium 4-chlorobenzenesulfinate (**2g**, 247.5 mg, 1.25 mmol) and 2-methylquinoline (**1a**, 67.5  $\mu$ L, 0.5 mmol). The residue was purified by column chromatography (silica gel, petroleum ether/ethyl acetate = 7:1) to give **3g** as white solid; yield: 112 mg (71%), mp 147.8-148.9  $^{\circ}$ C.

$^1\text{H}$  NMR ( $\text{CDCl}_3$ , 400 MHz, ppm):  $\delta$  8.19 (d,  $J$  = 8.4 Hz, 1H), 7.83 (d,  $J$  = 8.2 Hz, 2H), 7.69 (t,  $J$  = 7.4 Hz, 1H), 7.60-7.56 (m, 4H), 7.37 (d,  $J$  = 8.2 Hz, 2H), 4.73 (s, 2H);  $^{13}\text{C}$  NMR (100 MHz,  $\text{CDCl}_3$ , ppm):  $\delta$  149.1, 147.9, 140.5, 137.0, 130.1, 130.0, 130.0, 129.2, 129.2, 127.6, 127.4, 127.3, 122.7, 65.3.

### 2-(((4-Bromophenyl)sulfonyl)methyl)quinoline (**3h**)

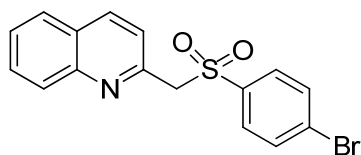

The reaction was conducted with sodium 4-bromobenzenesulfinate (**2h**, 302.5 mg, 1.25 mmol) and 2-methylquinoline (**1a**, 67.5  $\mu$ L, 0.5 mmol). The residue was purified by column chromatography (silica gel, petroleum ether/ethyl acetate = 7:1) to give **3h** as white solid; yield: 130 mg (72%), mp 134.8-135.9  $^{\circ}$ C.

$^1\text{H}$  NMR ( $\text{CDCl}_3$ , 400 MHz, ppm):  $\delta$  8.19 (d,  $J$  = 8.4 Hz, 1H), 7.83 (d,  $J$  = 8.3 Hz, 2H), 7.70 (t,  $J$

= 7.6 Hz, 1H), 7.60-7.48 (m, 6H), 4.72 (s, 2H);  $^{13}\text{C}$  NMR (100 MHz,  $\text{CDCl}_3$ , ppm):  $\delta$  149.1, 147.9, 137.5, 137.0, 132.2, 130.1, 130.0, 129.2, 129.1, 127.6, 127.4, 127.3, 122.7, 65.3. HRMS calcd. for:  $\text{C}_{16}\text{H}_{13}\text{BrNO}_2\text{S}$   $[\text{M}+\text{H}]^+$  361.9844, found 361.9842.

### 2-(((4-(Trifluoromethyl)phenyl)sulfonyl)methyl)quinoline (3i)

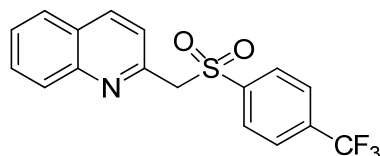

The reaction was conducted with sodium 4-(trifluoromethyl)benzenesulfinate (**2i**, 290 mg, 1.25 mmol) and 2-methylquinoline (**1a**, 67.5  $\mu\text{L}$ , 0.5 mmol). The residue was purified by column chromatography (silica gel, petroleum ether/ethyl acetate = 7:1) to give **3i** as white solid; yield: 82.5 mg (47%), mp 180.5-181.4  $^{\circ}\text{C}$ .

$^1\text{H}$  NMR ( $\text{CDCl}_3$ , 400 MHz, ppm):  $\delta$  8.21 (d,  $J$  = 8.4 Hz, 1H), 7.83 (d,  $J$  = 8.0 Hz, 1H), 7.75 (t,  $J$  = 9.6 Hz, 3H), 7.70-7.65 (m, 3H), 7.62-7.55 (m, 2H), 4.76 (s, 2H);  $^{13}\text{C}$  NMR (100 MHz,  $\text{CDCl}_3$ , ppm):  $\delta$  148.8, 147.8, 141.7, 137.1, 135.4 (q,  $J$  = 73.0 Hz), 130.1, 129.3, 129.0, 127.6, 127.4, 127.3, 123.1 (q,  $J$  = 271.0 Hz), 125.9 (q,  $J$  = 36.9 Hz), 122.6, 65.1; HRMS calcd. for:  $\text{C}_{17}\text{H}_{13}\text{F}_3\text{NO}_2\text{S}$   $[\text{M}+\text{H}]^+$  352.0613, found 352.0611.

### 2-(((4-(Trifluoromethoxy)phenyl)sulfonyl)methyl)quinoline (3j)

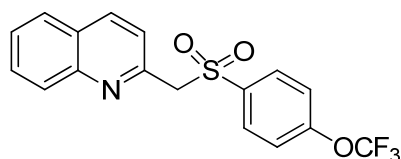

The reaction was conducted with sodium 4-(trifluoromethoxy)benzenesulfinate (**2j**, 310 mg, 1.25 mmol) and 2-methylquinoline (**1a**, 67.5  $\mu\text{L}$ , 0.5 mmol). The residue was purified by column chromatography (silica gel, petroleum ether/ethyl acetate = 7:1) to give **3j** as dark solid; yield: 130 mg (71%), mp 141.8-143.2  $^{\circ}\text{C}$ .

$^1\text{H}$  NMR ( $\text{CDCl}_3$ , 400 MHz, ppm):  $\delta$  8.20 (d,  $J$  = 8.4 Hz, 1H), 7.84-7.54 (m, 7H), 7.21 (d,  $J$  = 8.2 Hz, 2H), 4.74 (s, 2H);  $^{13}\text{C}$  NMR (100 MHz,  $\text{CDCl}_3$ , ppm):  $\delta$  153.0, 149.1, 147.8, 137.0, 136.5, 130.9, 130.0, 129.1, 127.5, 127.3, 127.26, 120.2 (q,  $J$  = 258 Hz), 122.6, 120.6, 65.3; HRMS calcd. for:  $\text{C}_{17}\text{H}_{13}\text{F}_3\text{NO}_3\text{S}$   $[\text{M}+\text{H}]^+$  368.0562, found 368.0561.



### 2-((Naphthalen-2-ylsulfonyl)methyl)quinoline (3k)

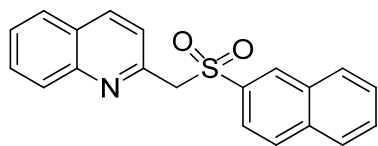

The reaction was conducted with sodium naphthalene-2-sulfinate (**2k**, 267.5 mg, 1.25 mmol) and 2-methylquinoline (**1a**, 67.5  $\mu$ L, 0.5 mmol). The residue was purified by column chromatography (silica gel, petroleum ether/ethyl acetate = 7:1) to give **3k** as yellow solid; yield: 85 mg (51%), mp 170.1-171.6 °C.

$^1\text{H}$  NMR ( $\text{CDCl}_3$ , 400 MHz, ppm):  $\delta$  8.29 (s, 1H), 8.17 (d,  $J$  = 8.4 Hz, 1H), 7.89-7.80 (m, 4H), 7.74 (d,  $J$  = 8.4 Hz, 1H), 7.66-7.51 (m, 6H), 4.81 (s, 2H);  $^{13}\text{C}$  NMR (100 MHz,  $\text{CDCl}_3$ , ppm):  $\delta$  149.4, 147.9, 136.8, 135.6, 135.4, 132.1, 130.5, 129.8, 129.4, 129.2, 129.18, 129.1, 127.9, 127.5, 127.4, 127.4, 127.1, 123.1, 122.7, 65.4; HRMS calcd. for:  $\text{C}_{20}\text{H}_{15}\text{NO}_2\text{SNa}$   $[\text{M}+\text{Na}]^+$  356.0715, found 356.0714.

### 2-((Methylsulfonyl)methyl)quinoline (3l, CAS: 19499-11-7)<sup>[4]</sup>

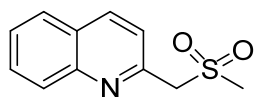

The reaction was conducted with sodium methanesulfinate (**2l**, 127.5 mg, 1.25 mmol) and 2-methylquinoline (**1a**, 67.5  $\mu$ L, 0.5 mmol). The residue was purified by column chromatography (silica gel, petroleum ether/ethyl acetate = 6:1) to give **3l** as yellow solid; yield: 55 mg (50%), mp 187.8-191.5 °C.

$^1\text{H}$  NMR ( $\text{CDCl}_3$ , 400 MHz, ppm):  $\delta$  8.24 (d,  $J$  = 8.4 Hz, 1H), 8.07 (d,  $J$  = 8.4 Hz, 1H), 7.87 (d,  $J$  = 8.0 Hz, 1H), 7.77 (t,  $J$  = 7.5 Hz, 1H), 7.62-7.59 (m, 2H), 4.61 (s, 2H), 2.96 (s, 3H);  $^{13}\text{C}$  NMR (100 MHz,  $\text{CDCl}_3$ , ppm):  $\delta$  150.0, 148.0, 137.4, 130.1, 129.2, 127.7, 127.5, 127.3, 122.8, 63.7, 40.1.

### 2-((Cyclopropylsulfonyl)methyl)quinoline (3m)

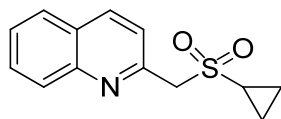

The reaction was conducted with sodium cyclopropanesulfinate (**2m**, 160 mg, 1.25 mmol) and 2-methylquinoline (**1a**, 67.5  $\mu$ L, 0.5 mmol). The residue was purified by column chromatography

(silica gel, petroleum ether/ethyl acetate = 7:1) to give **3m** as yellow solid; yield: 69 mg (56%), mp 118-120 °C

<sup>1</sup>H NMR (CDCl<sub>3</sub>, 400 MHz, ppm): δ 8.22 (d, *J* = 8.4 Hz, 1H), 8.08 (d, *J* = 8.4 Hz, 1H), 7.86 (d, *J* = 8.0 Hz, 1H), 7.75 (t, *J* = 7.6 Hz, 1H), 7.66-7.57 (m, 2H), 4.68 (s, 2H), 2.47-2.40 (m, 1H), 1.13-1.10 (m, 2H), 0.97-0.94 (m, 2H); <sup>13</sup>C NMR (CDCl<sub>3</sub>, 100 MHz, ppm): δ 149.9, 147.9, 137.0, 130.0, 129.2, 127.6, 127.4, 127.1, 122.7, 63.0, 29.3, 4.9; HRMS calcd. for: C<sub>13</sub>H<sub>14</sub>NO<sub>2</sub>S [M+H]<sup>+</sup> 248.0739, found 248.0739.

#### 6-Methyl-2-((phenylsulfonyl)methyl)quinoline (3n)

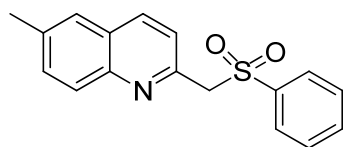

The reaction was conducted with sodium benzenesulfinate (**2a**, 205 mg, 1.25 mmol) and 2,6-dimethylquinoline (**1b**, 78.5 mg, 0.5 mmol). The residue was purified by column chromatography (silica gel, petroleum ether/ethyl acetate = 5:1) to give **3n** as white solid; yield: 127.7 mg (86%), mp 132.5-133.7 °C.

<sup>1</sup>H NMR (CDCl<sub>3</sub>, 400 MHz, ppm): δ 8.07 (d, *J* = 8.4 Hz, 1H), 7.72-7.64 (m, 3H), 7.57-7.48 (m, 4H), 7.40 (t, *J* = 7.6 Hz, 2H), 4.71 (s, 2H), 2.53 (s, 3H); <sup>13</sup>C NMR (CDCl<sub>3</sub>, 100 MHz, ppm): δ 148.2, 146.4, 138.3, 137.1, 136.1, 133.6, 132.1, 128.8, 128.79, 128.5, 127.3, 126.3, 122.6, 65.2, 21.5; HRMS calcd. for: C<sub>17</sub>H<sub>15</sub>NO<sub>2</sub>SNa [M+Na]<sup>+</sup> 320.0715, found 320.0713.

#### 6-Fluoro-2-((phenylsulfonyl)methyl)quinoline (3o)

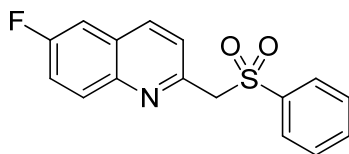

The reaction was conducted with sodium benzenesulfinate (**2a**, 205 mg, 1.25 mmol) and 6-fluoro-2-methylquinoline (**1c**, 80.5 mg, 0.5 mmol). The residue was purified by column chromatography (silica gel, petroleum ether/ethyl acetate = 6:1) to give **3o** as white solid; yield: 112.8 mg (75%), mp 161-162.5 °C.

<sup>1</sup>H NMR (CDCl<sub>3</sub>, 400 MHz, ppm): δ 8.13 (d, *J* = 8.4 Hz, 1H), 7.83 (m, 1H), 7.67 (d, *J* = 7.6 Hz,

2H), 7.59 (m, 2H), 7.43 (m, 4H), 4.72 (s, 2H);  $^{13}\text{C}$  NMR ( $\text{CDCl}_3$ , 100 MHz, ppm):  $\delta$  160.7 (d,  $J$  = 248 Hz), 148.5, 144.9, 138.1, 136.2, 133.8, 131.6 (d,  $J$  = 9.3 Hz), 128.9, 128.4, 127.9 (d,  $J$  = 10.4 Hz), 123.4, 120.1 (d,  $J$  = 25.8 Hz), 110.5 (d,  $J$  = 21.7 Hz), 65.0; HRMS calcd. for:  $\text{C}_{16}\text{H}_{12}\text{FNO}_2\text{SNa}$   $[\text{M}+\text{Na}]^+$  324.0465, found 324.0463.

### 6-Bromo-2-((phenylsulfonyl)methyl)quinoline (3p)

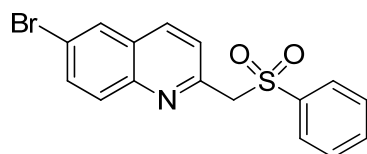

The reaction was conducted with sodium benzenesulfinate (**2a**, 205 mg, 1.25 mmol) and 6-bromo-2-methylquinoline (**1d**, 111 mg, 0.5 mmol). The residue was purified by column chromatography (silica gel, petroleum ether/ethyl acetate = 5:1) to give **3p** as yellow solid; yield: 157 mg (84%), mp 164.3-166.5 °C.

$^1\text{H}$  NMR ( $\text{CDCl}_3$ , 400 MHz, ppm):  $\delta$  8.08 (d,  $J$  = 8.4 Hz, 1H), 7.98 (s, 1H), 7.74-7.65 (m, 4H), 7.61-7.56 (m, 2H), 7.42 (t,  $J$  = 7.6 Hz, 2H), 4.71 (s, 2H);  $^{13}\text{C}$  NMR ( $\text{CDCl}_3$ , 100 MHz, ppm):  $\delta$  149.7, 146.3, 138.2, 135.7, 133.7, 133.2, 130.8, 129.5, 128.9, 128.4, 128.3, 123.5, 121.0, 65.1; HRMS calcd. for:  $\text{C}_{16}\text{H}_{13}\text{BrNO}_2\text{S}$   $[\text{M}+\text{H}]^+$  361.9844, found 361.9841.

### 7-Fluoro-2-((phenylsulfonyl)methyl)quinoline (3q)

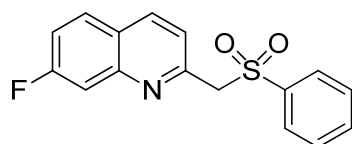

The reaction was conducted with sodium benzenesulfinate (**2a**, 205 mg, 1.25 mmol) and 7-fluoro-2-methylquinoline (**1e**, 80.5 mg, 0.5 mmol). The residue was purified by column chromatography (silica gel, petroleum ether/ethyl acetate = 6:1) to give **3q** as yellow solid; yield: 141.5 mg (94%), mp 141.9-142.8 °C.

$^1\text{H}$  NMR ( $\text{CDCl}_3$ , 400 MHz, ppm):  $\delta$  8.17 (d,  $J$  = 8.4 Hz, 1H), 7.84-7.80 (m, 1H), 7.67 (d,  $J$  = 7.8 Hz, 2H), 7.61-7.56 (m, 2H), 7.46-7.41 (m, 3H), 7.34 (t,  $J$  = 7.5 Hz, 1H), 4.72 (s, 2H);  $^{13}\text{C}$  NMR ( $\text{CDCl}_3$ , 100 MHz, ppm):  $\delta$  163.1 (d,  $J$  = 269.3 Hz), 150.3, 148.6 (d,  $J$  = 12.6 Hz), 138.2, 136.6, 133.7, 129.5 (d,  $J$  = 9.9 Hz), 128.8, 128.3, 124.2, 122.0 (d,  $J$  = 2.4 Hz), 117.6 (d,  $J$  = 25.4 Hz), 112.6 (d,  $J$  = 20.3 Hz), 64.9; HRMS calcd. for:  $\text{C}_{16}\text{H}_{13}\text{FNO}_2\text{S}$   $[\text{M}+\text{H}]^+$  302.0645, found 302.0645.

### 7-Chloro-2-((phenylsulfonyl)methyl)quinoline (3r)

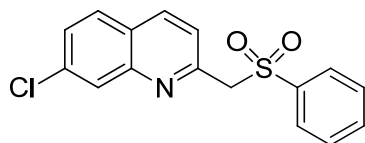

The reaction was conducted with sodium benzenesulfinate (**2a**, 205 mg, 1.25 mmol) and 7-chloro-2-methylquinoline (**1f**, 89 mg, 0.5 mmol). The residue was purified by column chromatography (silica gel, petroleum ether/ethyl acetate = 6:1) to give **3r** as white solid; yield: 143 mg (90%), mp 135.6-136.8 °C.

<sup>1</sup>H NMR (CDCl<sub>3</sub>, 400 MHz, ppm): δ 8.15 (d, *J* = 8.4 Hz, 1H), 7.83 (s, 1H), 7.76 (d, *J* = 8.7 Hz, 1H), 7.68 (d, *J* = 7.6 Hz, 2H), 7.62-7.58 (m, 2H), 7.51-7.49 (m, 1H), 7.43 (t, *J* = 7.7 Hz, 2H), 4.72 (s, 2H); <sup>13</sup>C NMR (CDCl<sub>3</sub>, 100 MHz, ppm): δ 150.3, 148.0, 138.2, 136.5, 135.5, 133.7, 128.9, 128.7, 128.7, 128.3, 128.0, 125.5, 122.8, 65.0; HRMS calcd. for: C<sub>16</sub>H<sub>13</sub>ClNO<sub>2</sub>S [M+H]<sup>+</sup> 318.0350, found 318.0349.

### 8-Methoxy-2-((phenylsulfonyl)methyl)quinoline (3s)

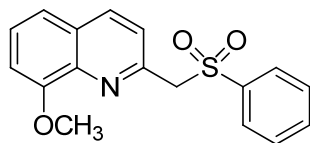

The reaction was conducted with sodium benzenesulfinate (**2a**, 205 mg, 1.25 mmol) and 8-methoxy-2-methylquinoline (**1g**, 86.5 mg, 0.5 mmol). The residue was purified by column chromatography (silica gel, petroleum ether/ethyl acetate = 4:1) to give **3s** as white solid; yield: 144 mg (92%), mp 142-143 °C.

<sup>1</sup>H NMR (CDCl<sub>3</sub>, 400 MHz, ppm): δ 8.13 (d, *J* = 8.4 Hz, 1H), 7.71 (d, *J* = 7.4 Hz, 2H), 7.63-7.55 (m, 2H), 7.48-7.37 (m, 4H), 7.02 (d, *J* = 7.6 Hz, 1H), 4.84 (s, 2H), 3.96 (s, 3H); <sup>13</sup>C NMR (CDCl<sub>3</sub>, 100 MHz, ppm): δ 155.2, 147.9, 139.8, 138.4, 136.8, 133.6, 128.9, 128.5, 128.48, 127.3, 123.1, 119.3, 108.3, 65.1, 56.0; HRMS calcd. for: C<sub>17</sub>H<sub>15</sub>NO<sub>3</sub>SNa [M+Na]<sup>+</sup> 336.0664, found 336.0660.

### 2-((Phenylsulfonyl)methyl)quinolin-8-ol (3t)

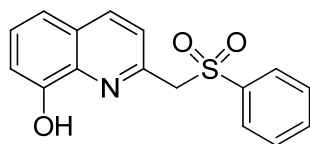

The reaction was conducted with sodium benzenesulfinate (**2a**, 205 mg, 1.25 mmol) and 2-methylquinolin-8-ol (**1h**, 79.5 mg, 0.5 mmol). The residue was purified by column chromatography (silica gel, petroleum ether/ethyl acetate = 7:1) to give **3t** as yellow solid; yield: 113.6 mg (76%), mp 157.6-159.8 °C.

<sup>1</sup>H NMR (CDCl<sub>3</sub>, 400 MHz, ppm): δ 8.17 (d, *J* = 8.4 Hz, 1H), 7.66-7.56 (m, 4H), 7.47-7.32 (m, 5H), 7.11 (d, *J* = 7.5 Hz, 1H), 4.71 (s, 2H); <sup>13</sup>C NMR (CDCl<sub>3</sub>, 100 MHz, ppm): δ 151.8, 147.2, 138.2, 137.6, 137.2, 133.9, 128.9, 128.5, 128.45, 127.6, 123.5, 117.7, 110.5, 64.7; HRMS calcd. for: C<sub>16</sub>H<sub>13</sub>NO<sub>3</sub>SNa [M+Na]<sup>+</sup> 322.0508, found 322.0507.

### 2-Methyl-3-((phenylsulfonyl)methyl)quinoxaline (**3u**)

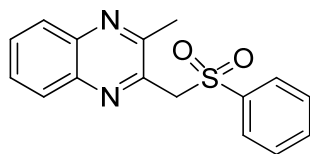

The reaction was conducted with sodium benzenesulfinate (**2a**, 205 mg, 1.25 mmol) and 2,3-dimethylquinoxaline (**1i**, 79 mg, 0.5 mmol). The residue was purified by column chromatography (silica gel, petroleum ether/ethyl acetate = 5:1) to give **3u** as white solid; yield: 74.6 mg (50%), mp 199-201 °C.

<sup>1</sup>H NMR (CDCl<sub>3</sub>, 400 MHz, ppm): δ 8.01 (d, *J* = 8.2 Hz, 1H), 7.74-7.62 (m, 6H), 7.50-7.44 (m, 2H), 4.82 (s, 2H), 2.89 (s, 3H); <sup>13</sup>C NMR (CDCl<sub>3</sub>, 100 MHz, ppm): δ 154.1, 144.3, 141.6, 140.7, 138.1, 134.0, 130.6, 129.4, 129.1, 128.8, 128.7, 128.4, 62.1, 23.1. HRMS calcd. for: C<sub>16</sub>H<sub>14</sub>N<sub>2</sub>O<sub>2</sub>SNa [M+Na]<sup>+</sup> 321.0614, found 326.0611.

### 2-Phenyl-3-((phenylsulfonyl)methyl)quinoxaline (**3v**)

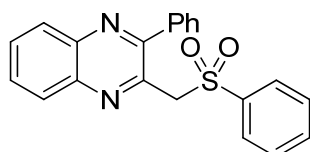

The reaction was conducted with sodium benzenesulfinate (**2a**, 205 mg, 1.25 mmol) and 2-methyl-3-phenylquinoxaline (**1j**, 110 mg, 0.5 mmol). The residue was purified by column

chromatography (silica gel, petroleum ether/ethyl acetate = 5:1) to give **3v** as white solid; yield: 124.2 mg (69%), mp 140-142 °C.

<sup>1</sup>H NMR (CDCl<sub>3</sub>, 400 MHz, ppm): δ 8.13 (d, *J* = 7.8 Hz, 1H), 7.88 (d, *J* = 7.8 Hz, 1H), 7.78 (m, 2H), 7.62 (m, 5H), 7.47 (m, 5H), 4.91 (s, 2H); <sup>13</sup>C NMR (CDCl<sub>3</sub>, 100 MHz, ppm): δ 155.4, 143.4, 141.3, 140.9, 138.9, 137.5, 133.8, 131.0, 130.3, 129.2, 129.2, 129.2, 129.0, 128.9, 128.7, 128.6, 61.1. HRMS calcd. for: C<sub>21</sub>H<sub>16</sub>N<sub>2</sub>O<sub>2</sub>SNa [M+Na]<sup>+</sup> 383.0825, found 383.0827.

#### 6-Fluoro-4-(phenylsulfonyl)-2-((phenylsulfonyl)methyl)quinoline (**3w**)

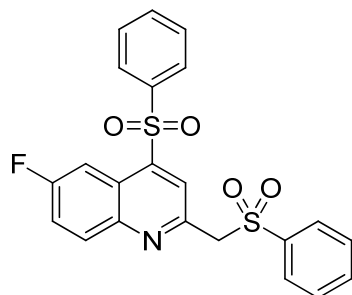

The reaction was conducted with sodium benzenesulfinate (**2a**, 205 mg, 1.25 mmol) and 4-chloro-6-fluoro-2-methylquinoline (**1k**, 97.5 mg, 0.5 mmol). The residue was purified by column chromatography (silica gel, petroleum ether/ethyl acetate = 6:1) to give **3w** as yellow solid; yield: 163 mg (37%), mp 173-175 °C.

<sup>1</sup>H NMR (CDCl<sub>3</sub>, 400 MHz, ppm): δ 8.32-8.28 (m, 2H), 8.02-7.96 (m, 3H), 7.71-7.44 (m, 9H), 4.79 (s, 2H); <sup>13</sup>C NMR (CDCl<sub>3</sub>, 100 MHz, ppm): δ 161.8 (d, *J* = 252 Hz), 148.4, 146.4, 145.3, 139.7, 138.2, 134.3, 134.2, 133.2, 133.1, 123.5, 129.7, 129.3, 128.4, 128.1, 123.9, 121.3 (d, *J* = 26 Hz), 108.4 (d, *J* = 26 Hz), 64.8; HRMS calcd. for: C<sub>22</sub>H<sub>16</sub>ClFNO<sub>4</sub>S<sub>2</sub>Na [M+Na]<sup>+</sup> 464.0397, found 464.0396.

#### References:

- [1] D. W. Wang, X. B. Wang, D. S. Wang, S. Duo, S. M. Lu, Y. G. Zhou, Y. X. Li, *J. Org. Chem.* **2009**, 74, 2780.
- [2] E. B. Kbott, *J. Chem. Soc.* **1955**, 949.
- [3] I. Masayuki, K. Hideki, M. Satoru, EP 1466898 A1, 2002.
- [4] J. E. Douglass, M. A. Gebhart, *J. Heterocycl. Chem.* **1990**, 27, 1433.

# <sup>1</sup>H and <sup>13</sup>C NMR spectra of products

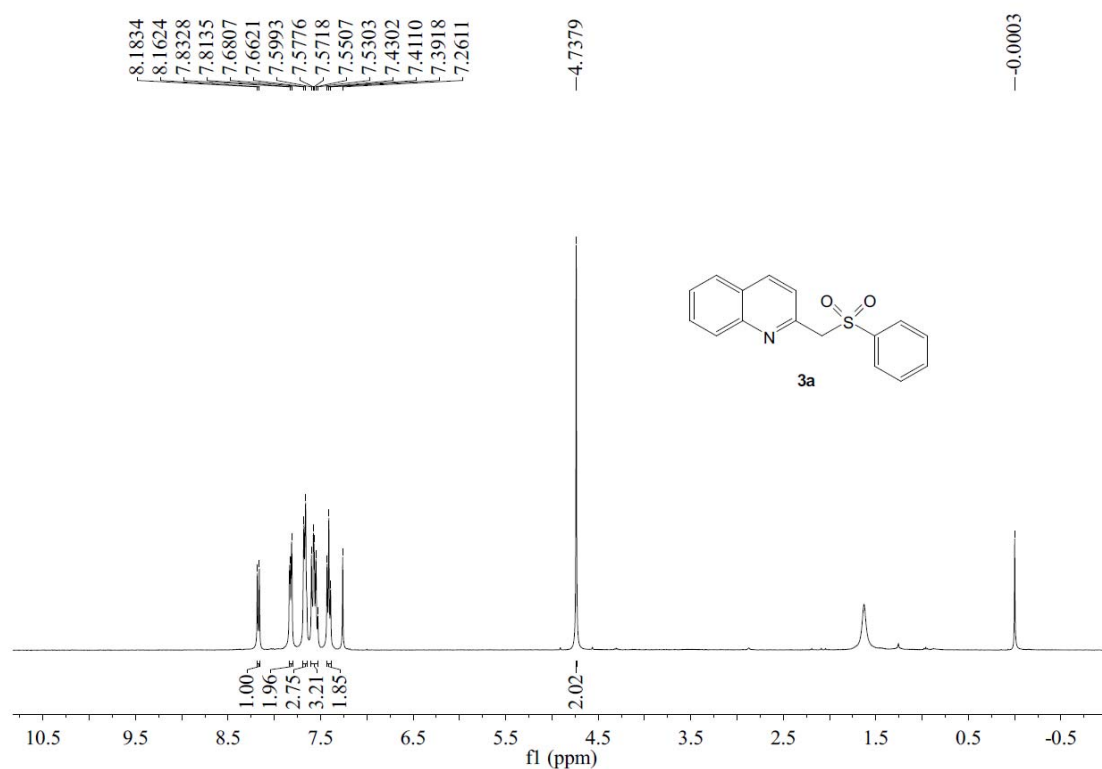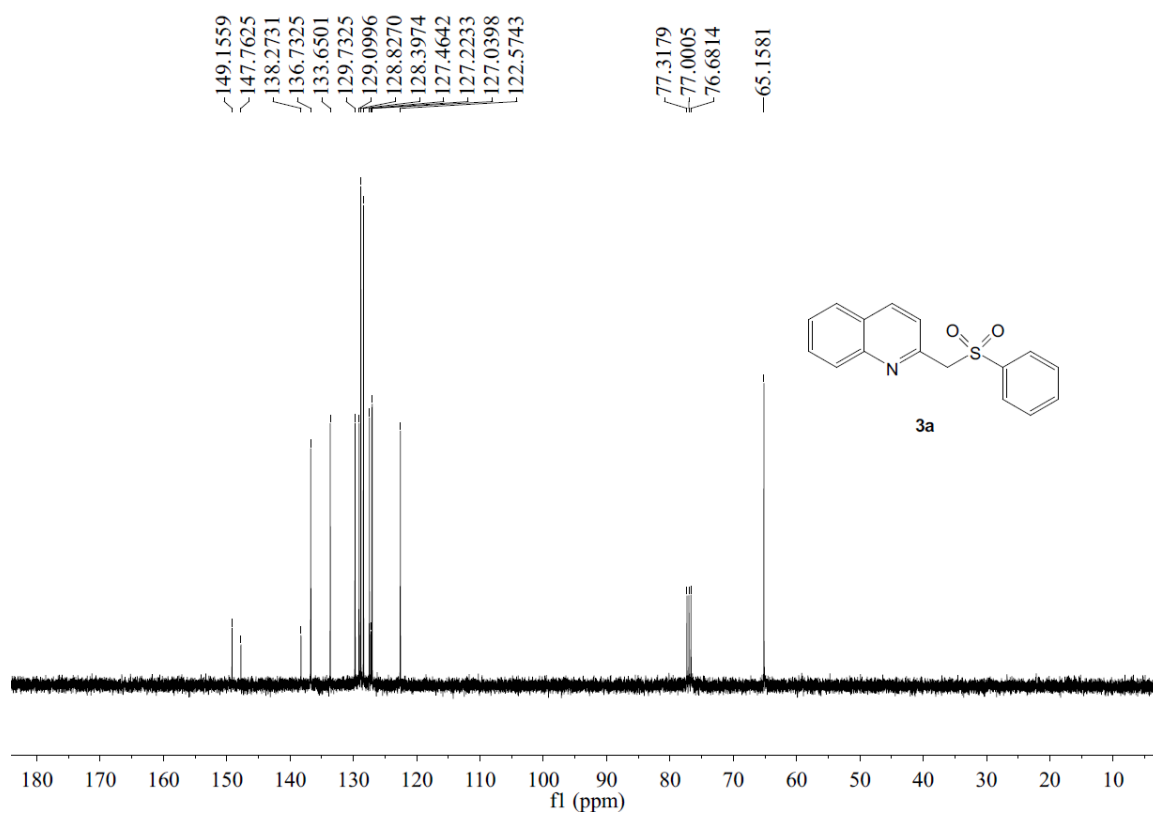

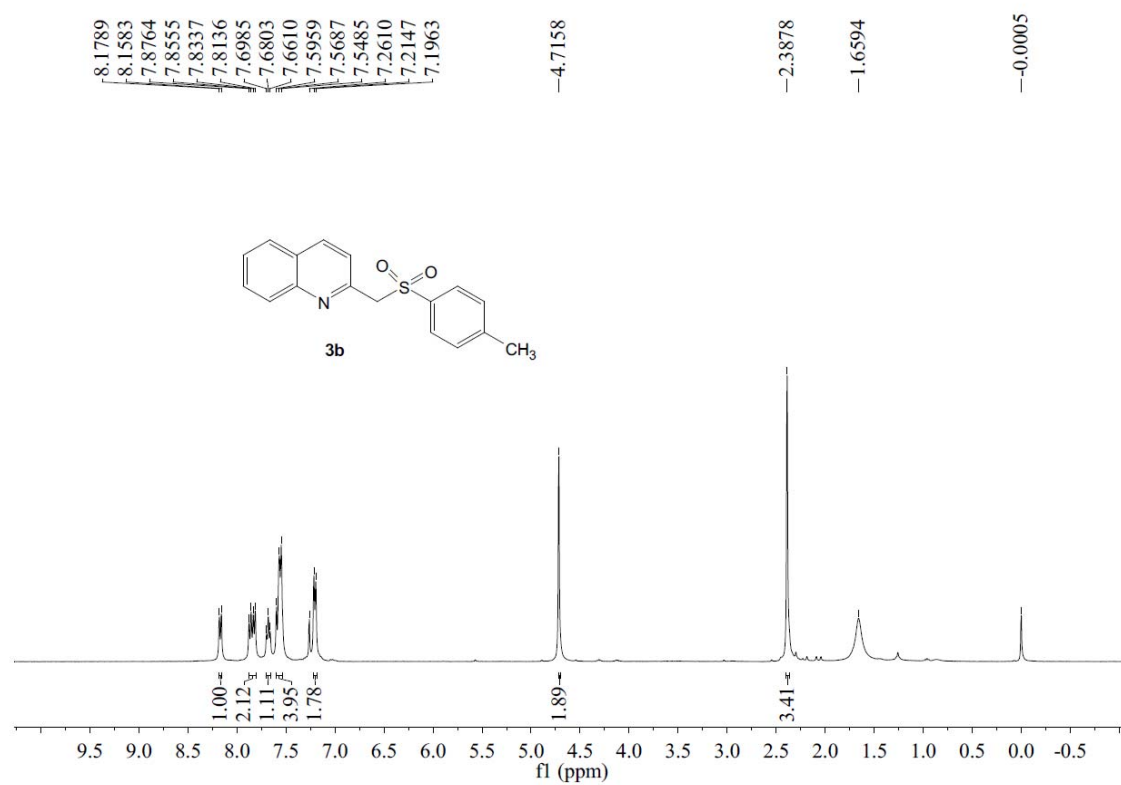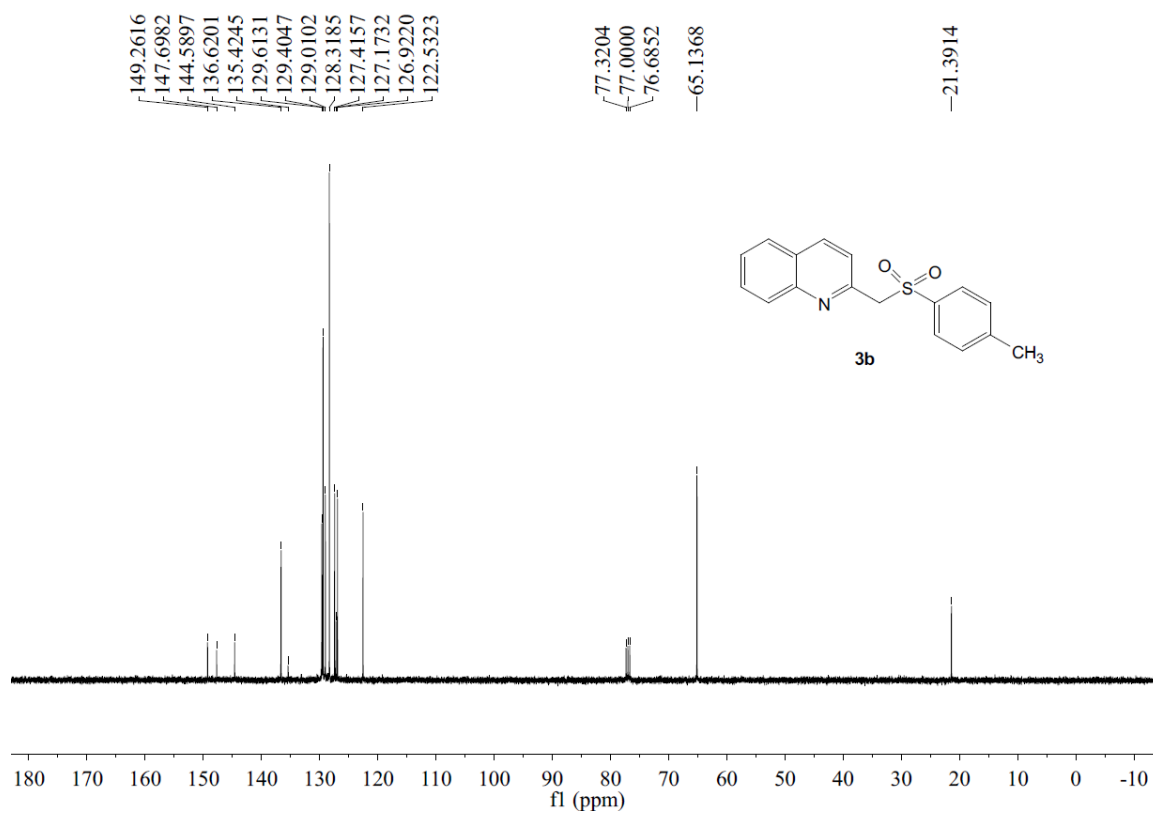



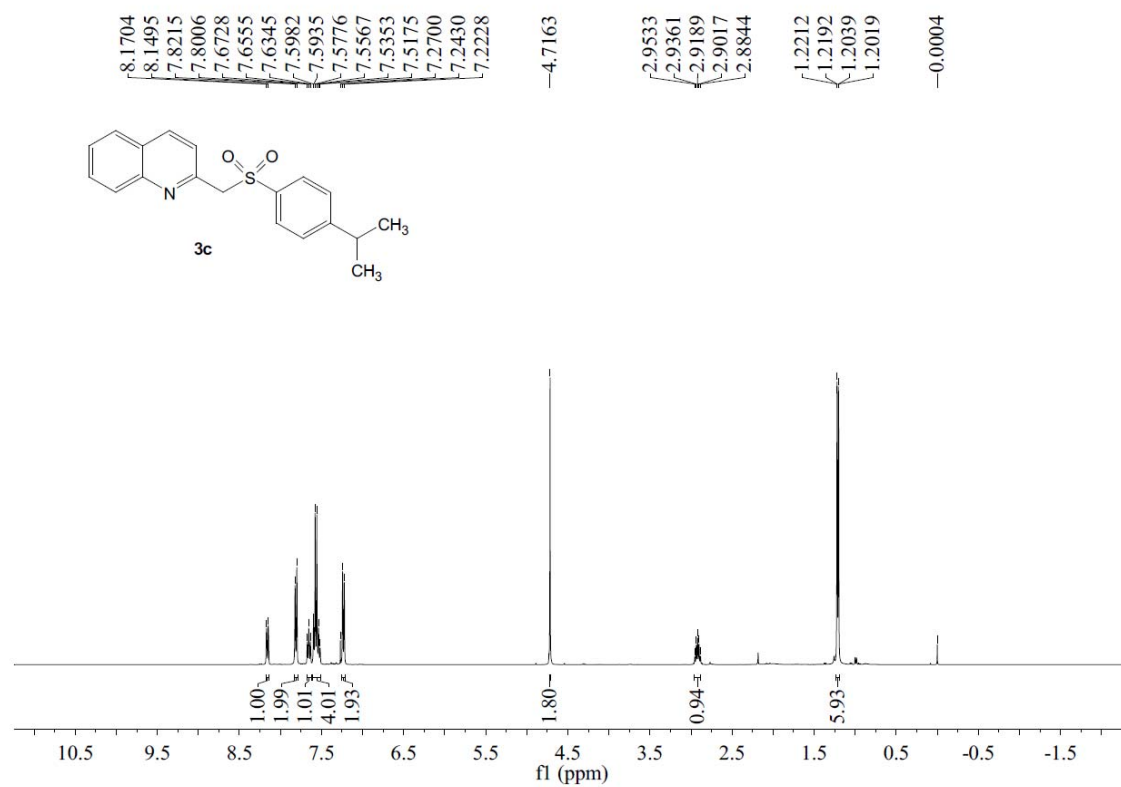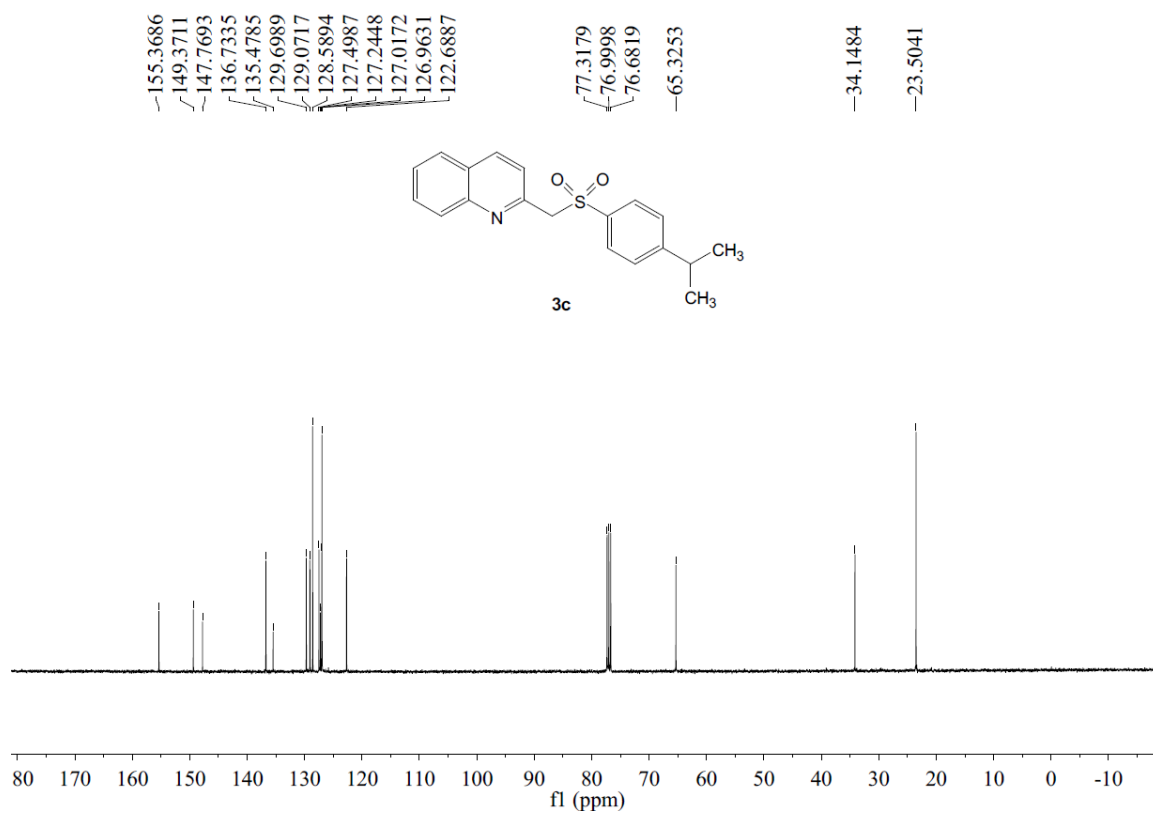

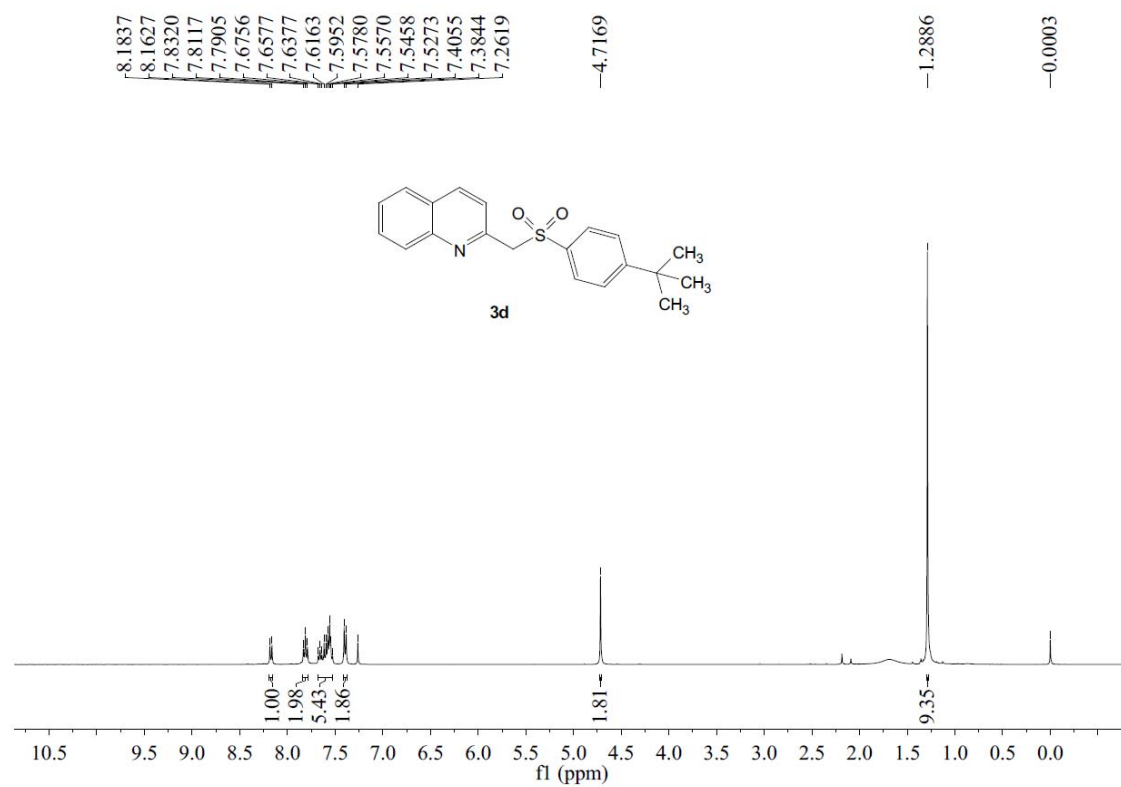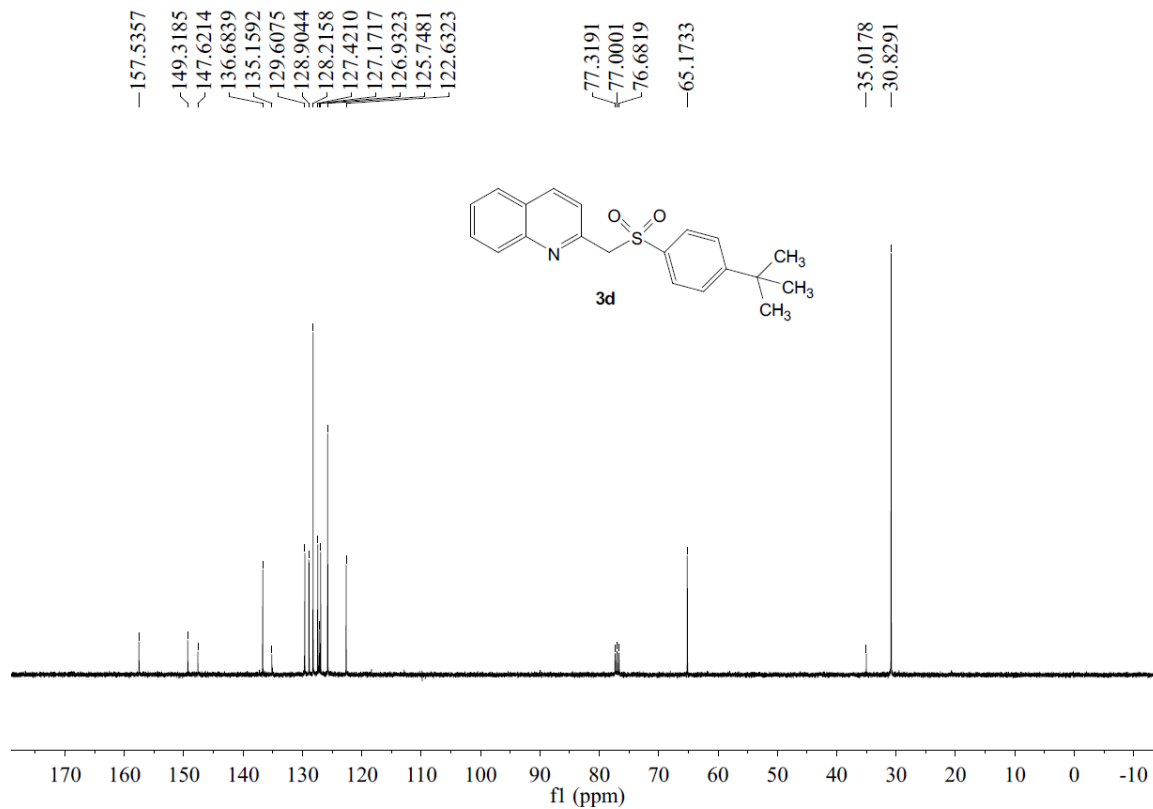

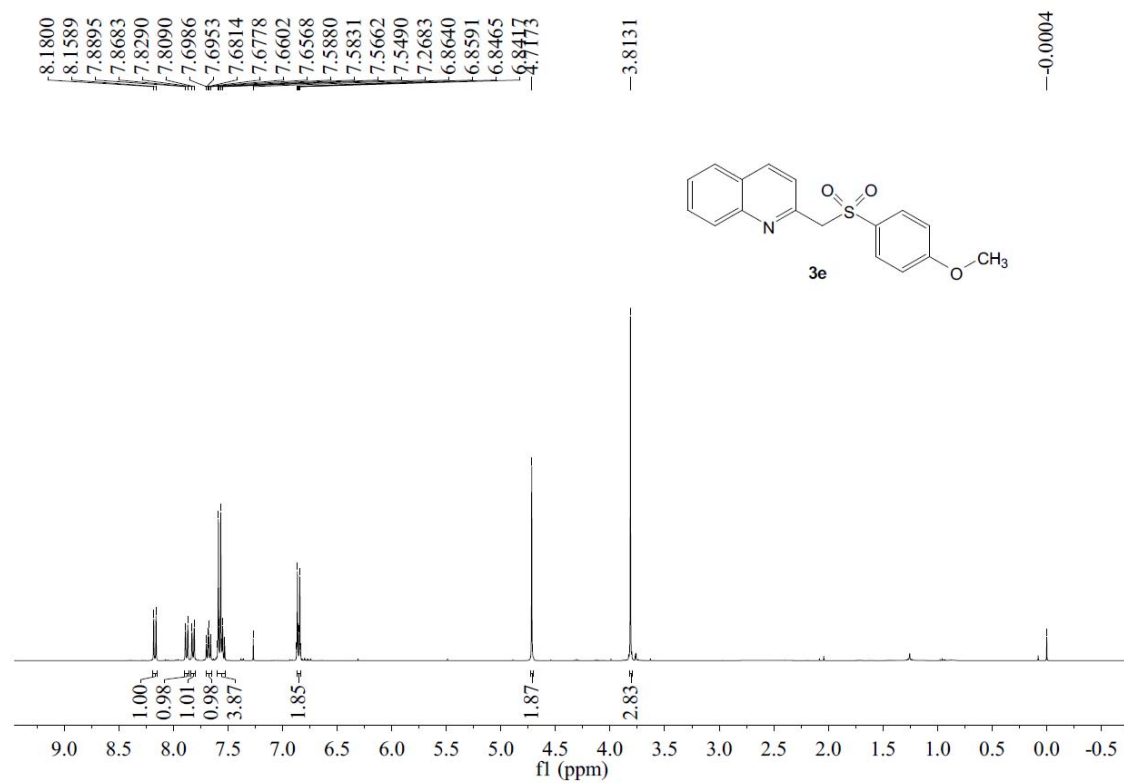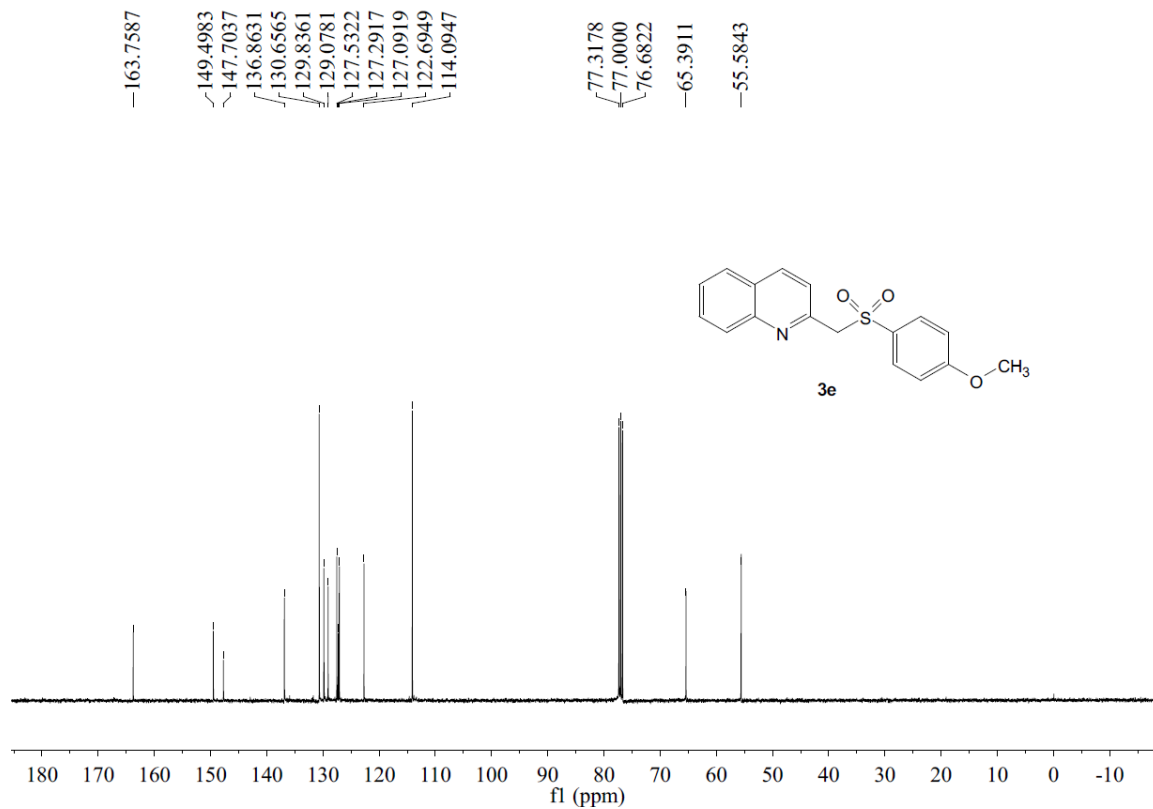

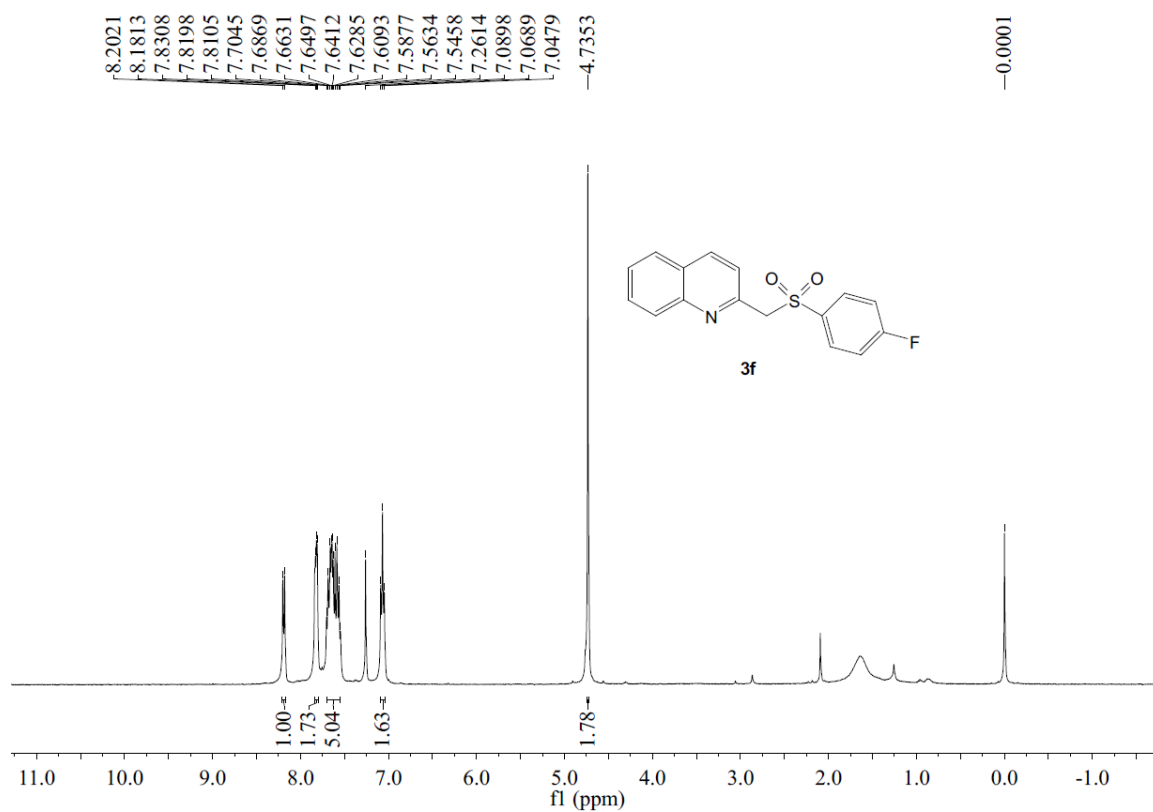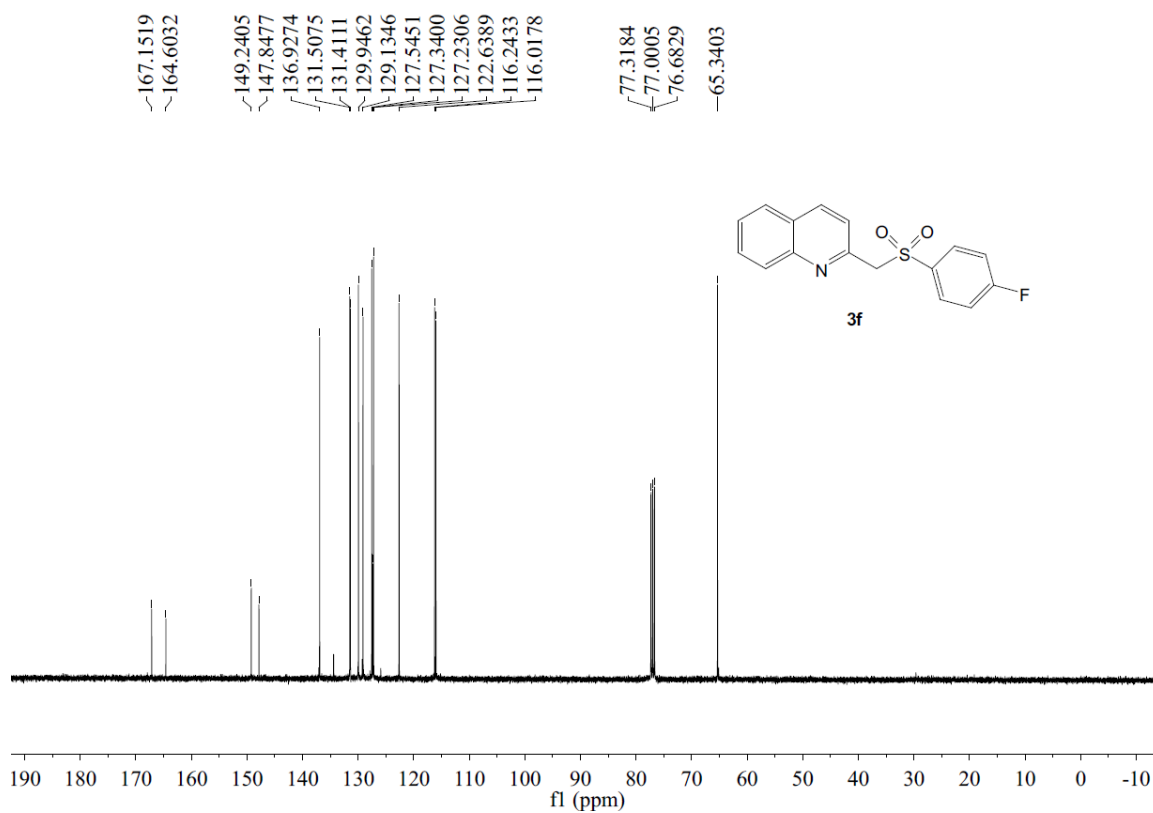

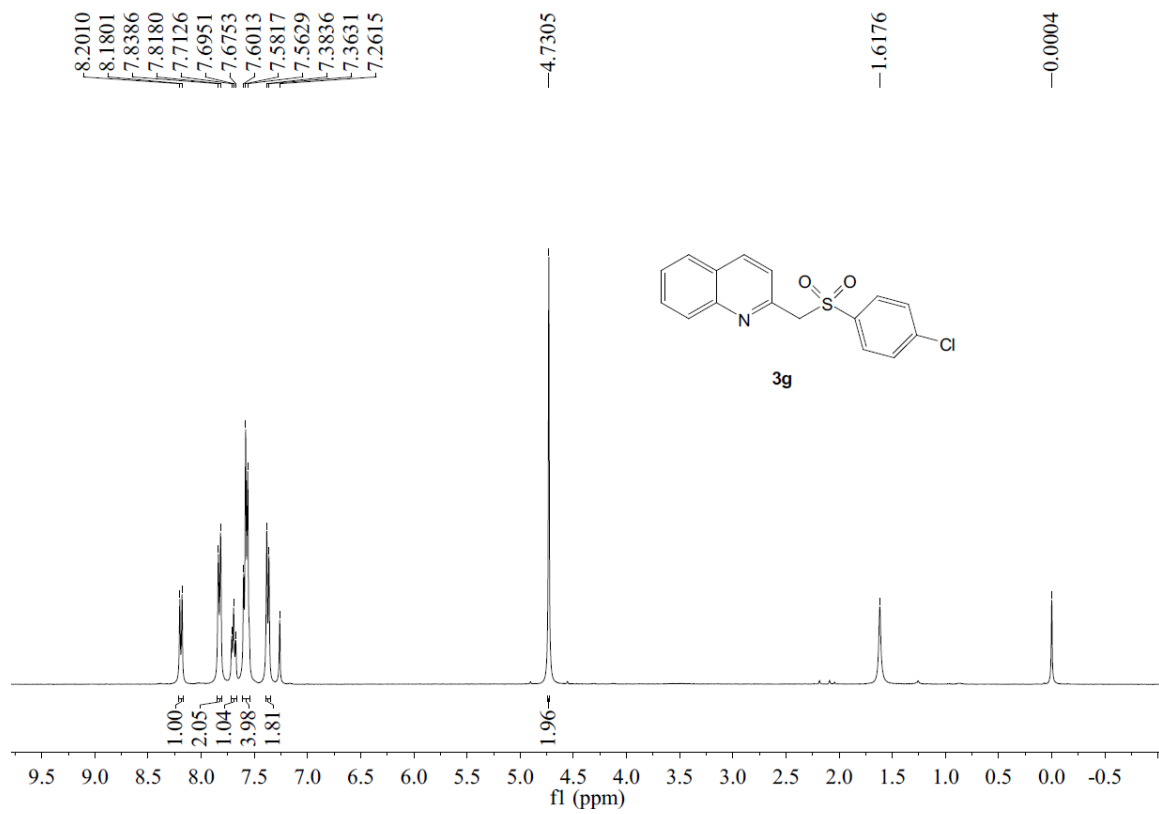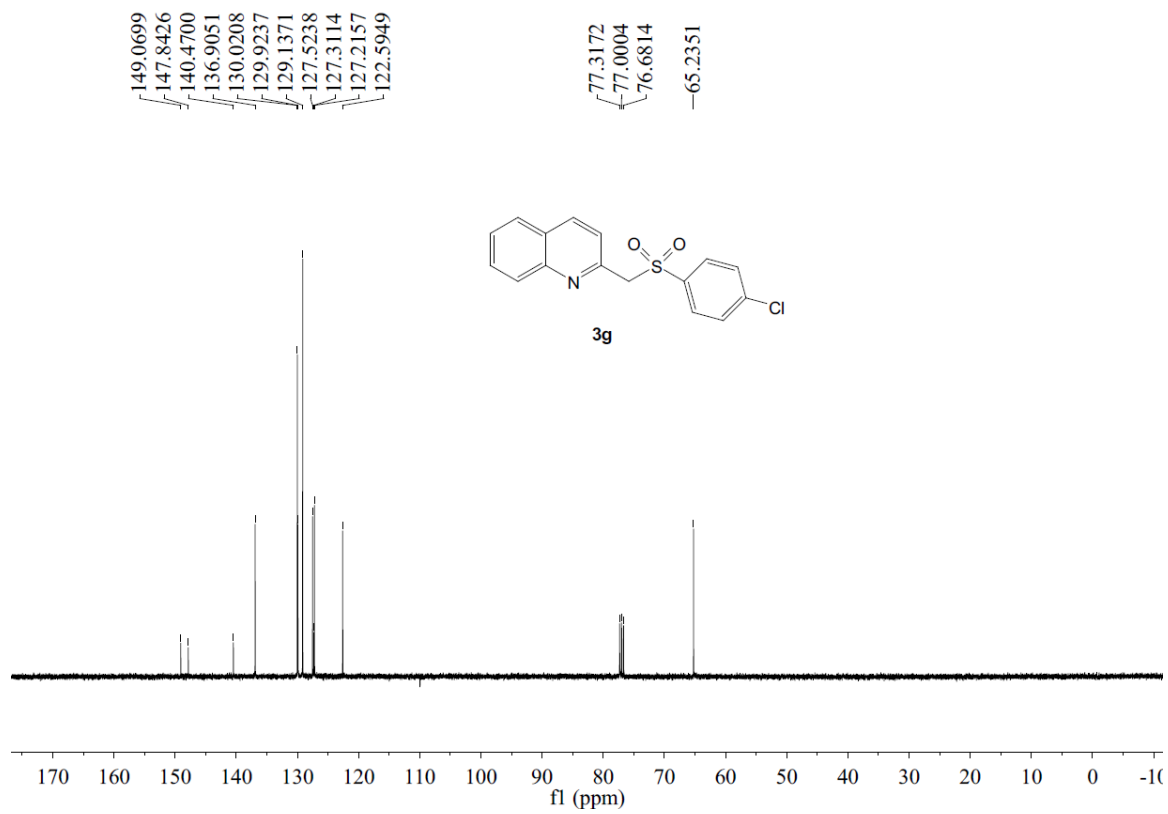

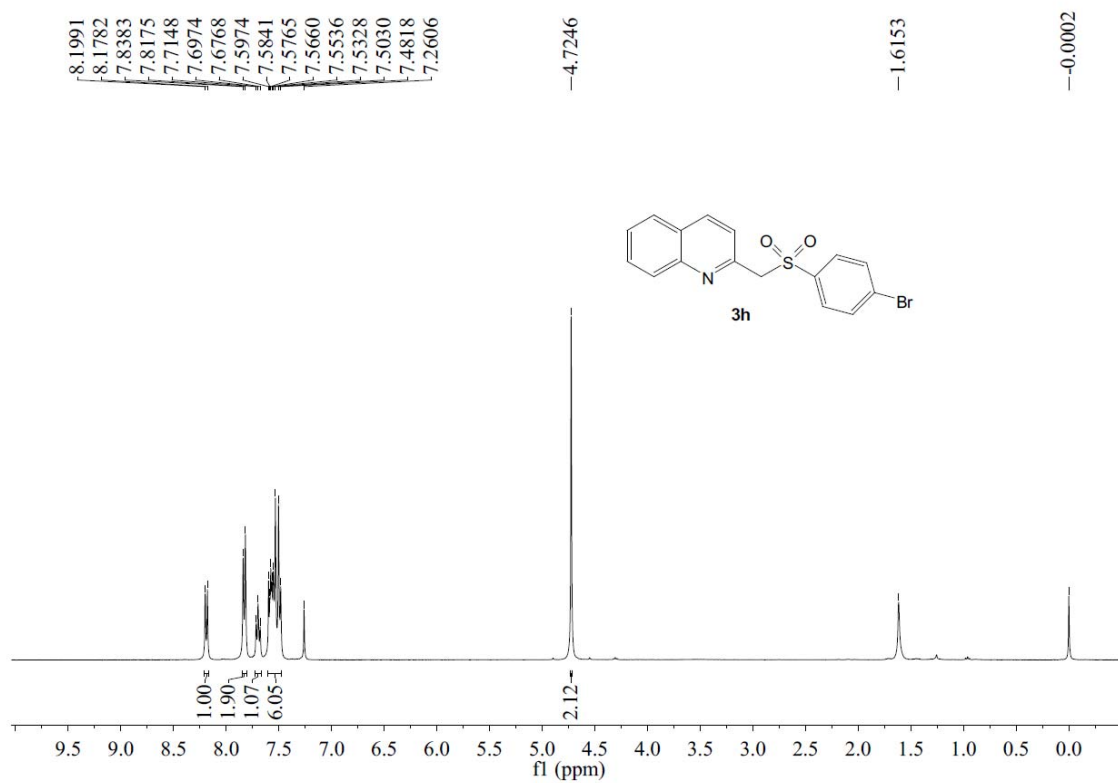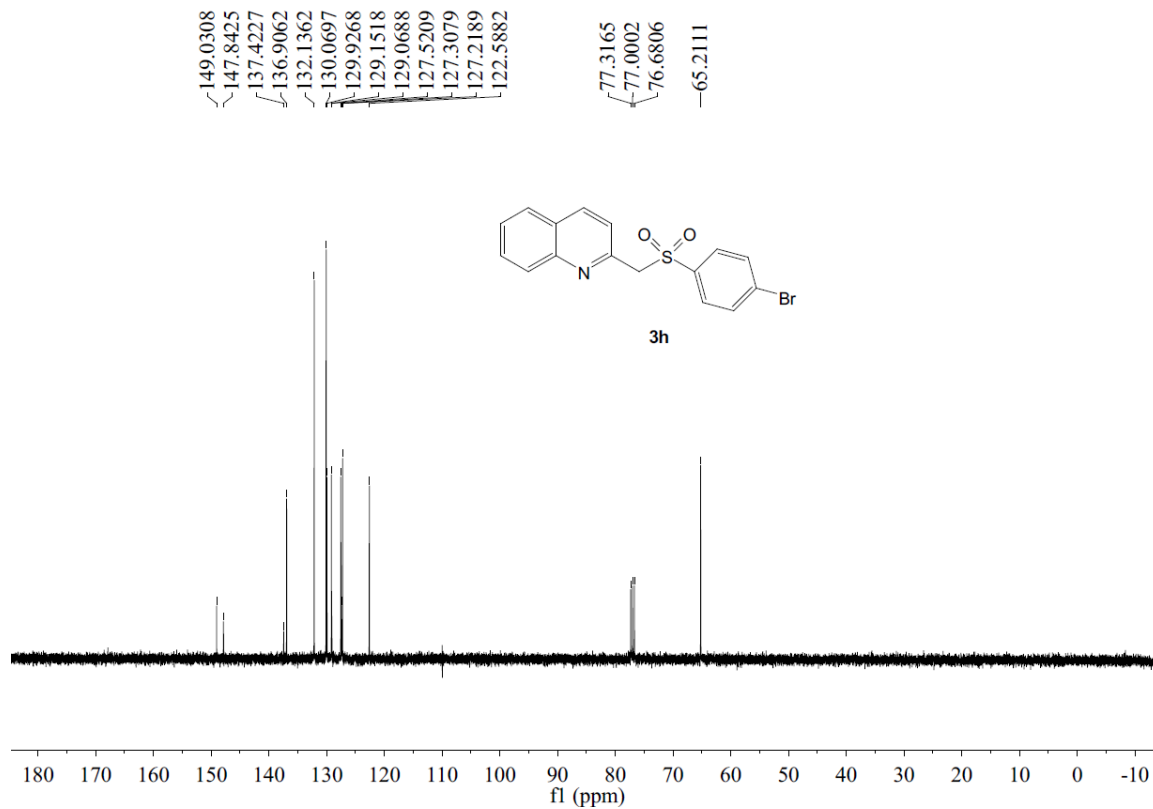

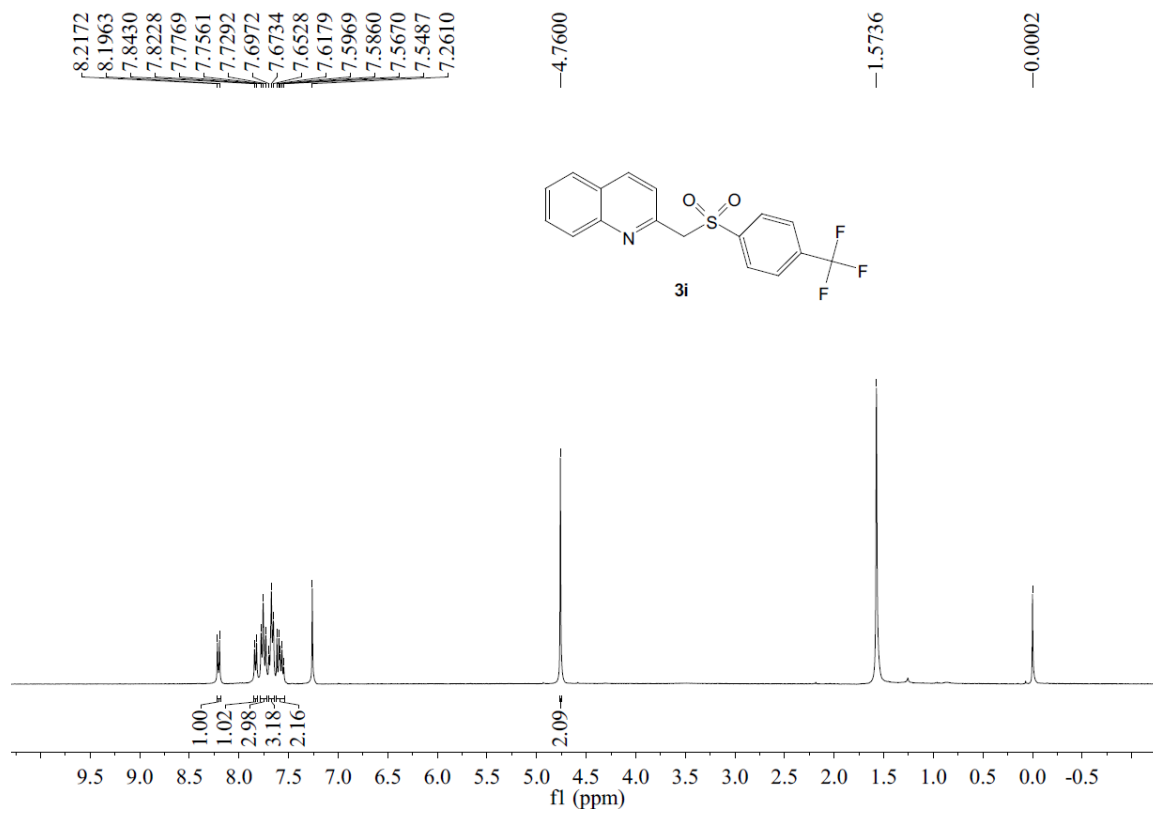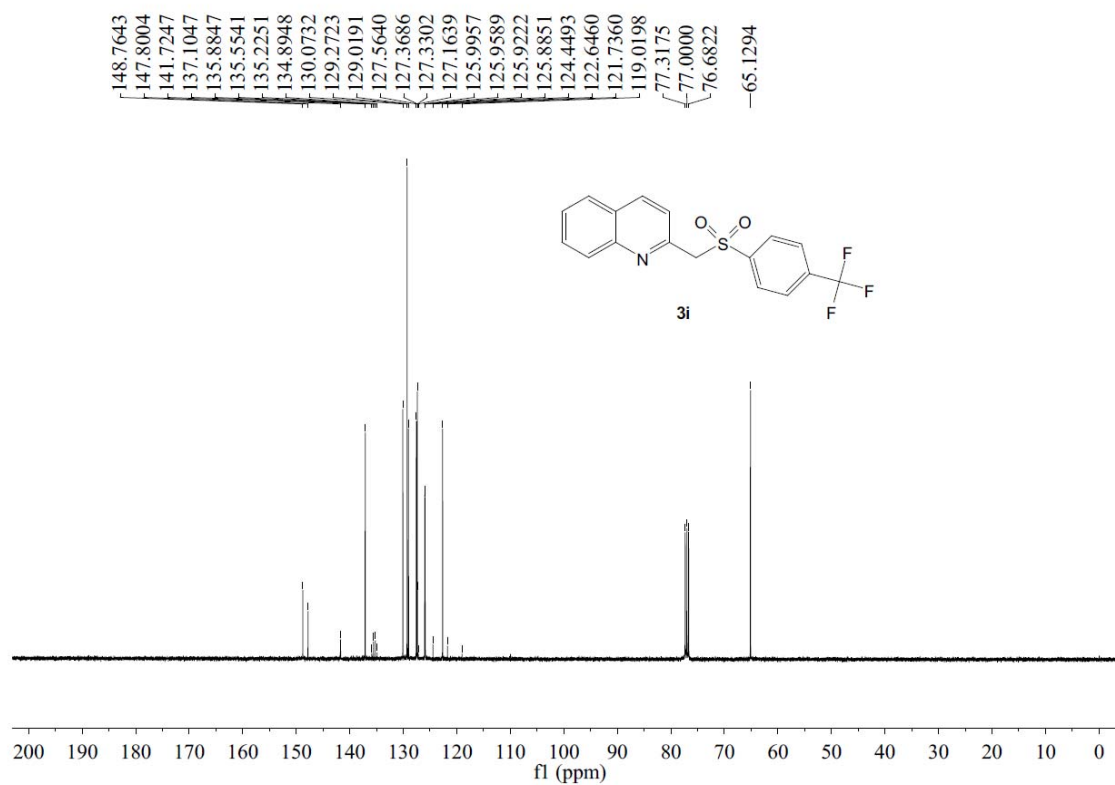

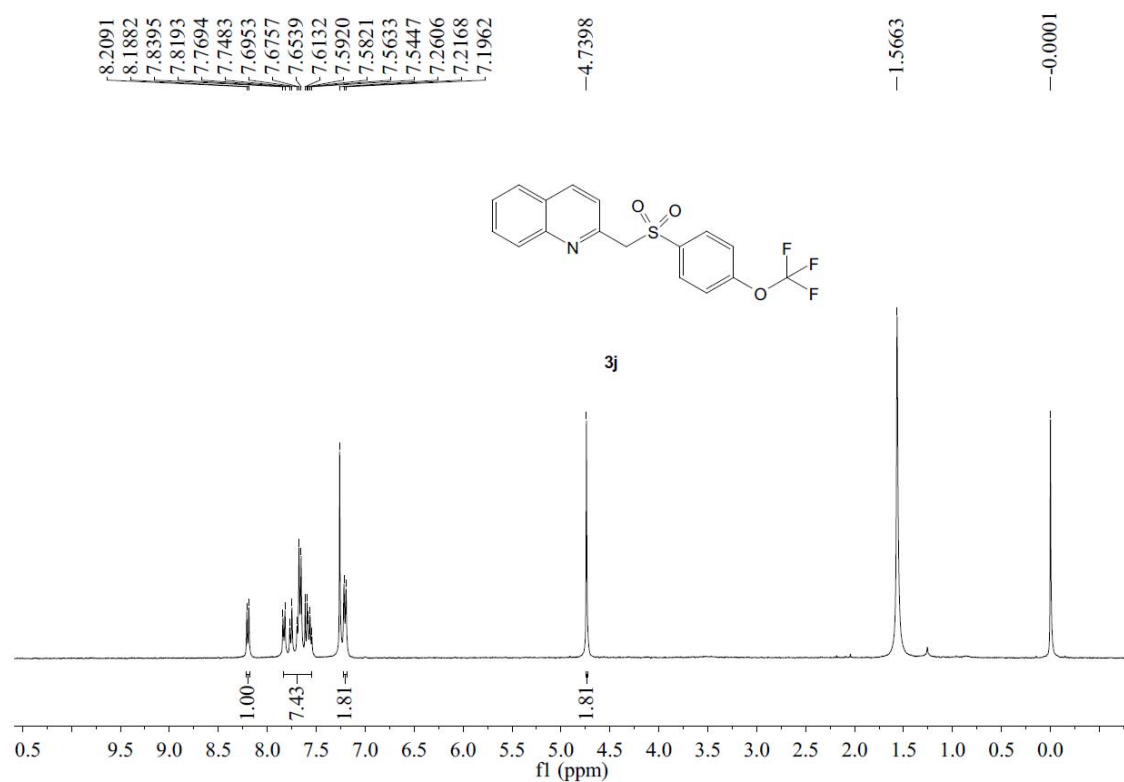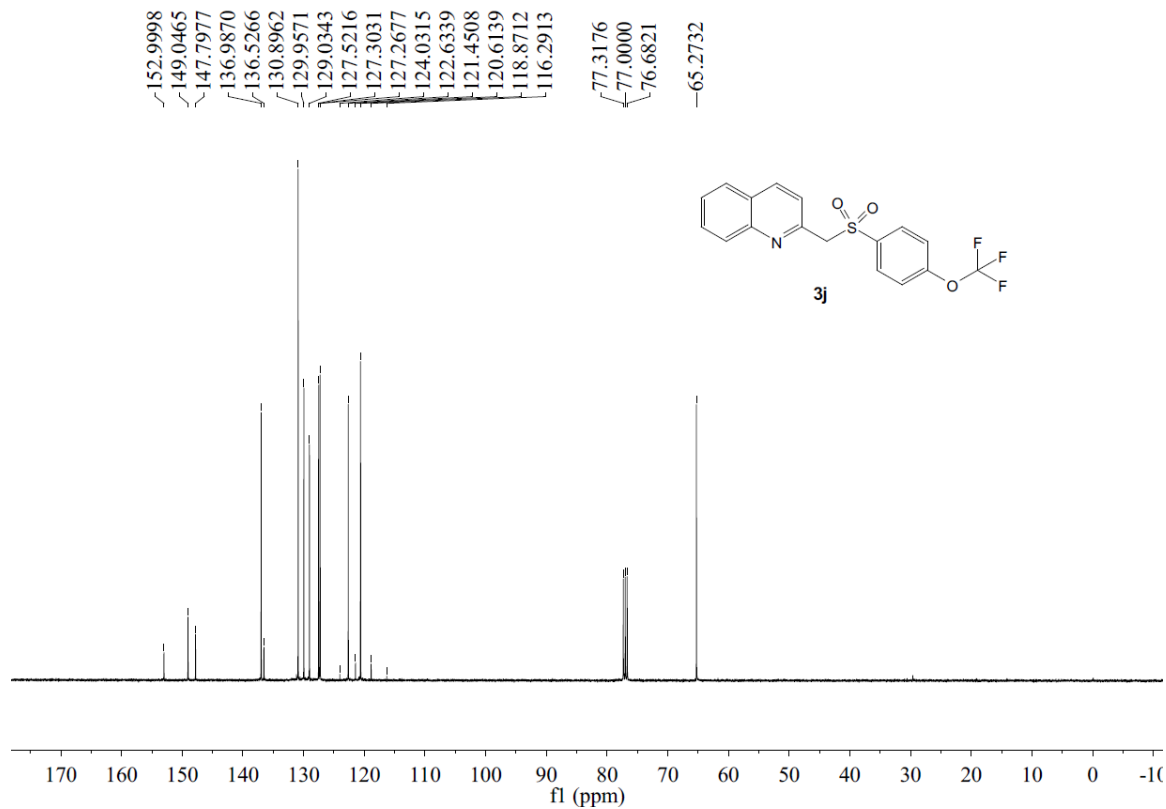



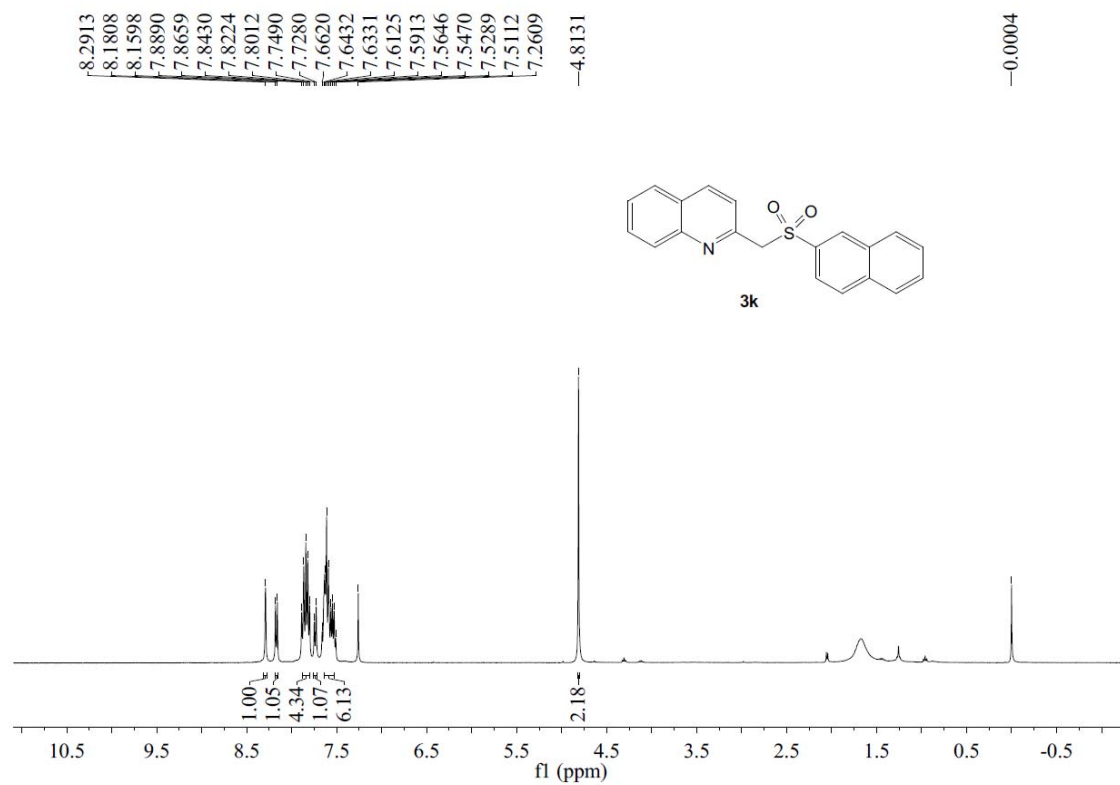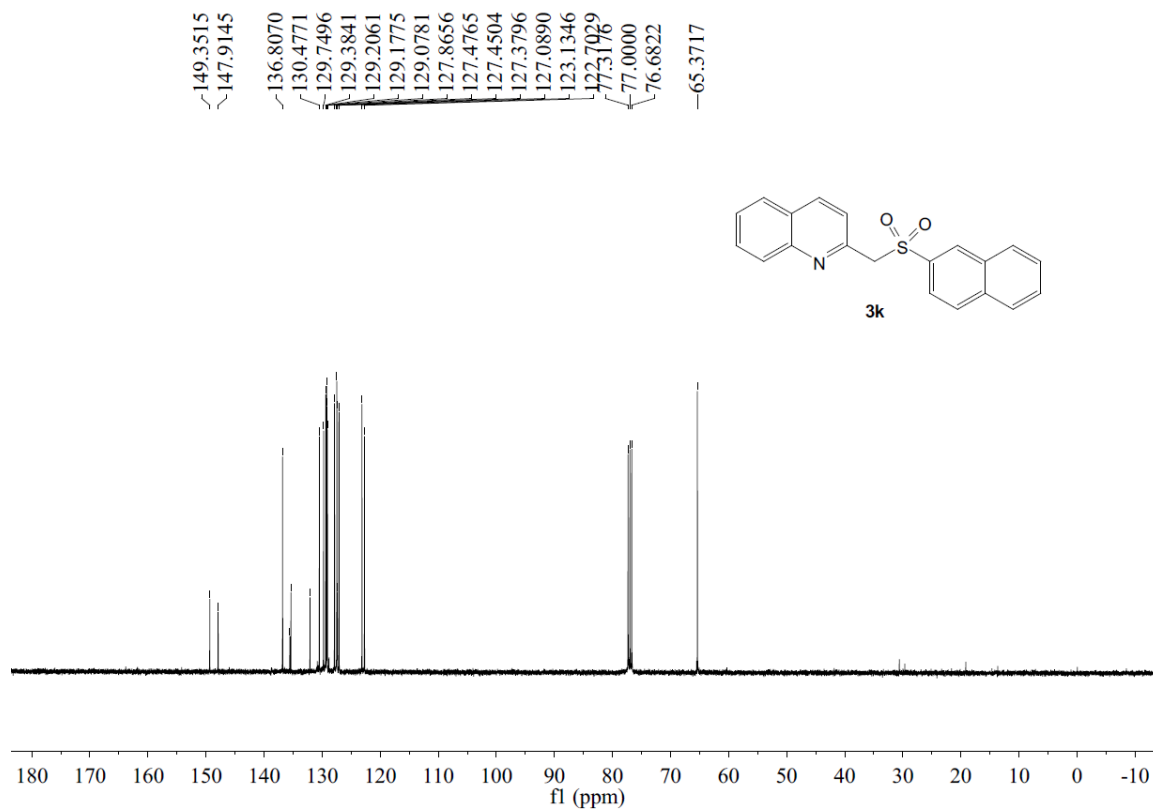

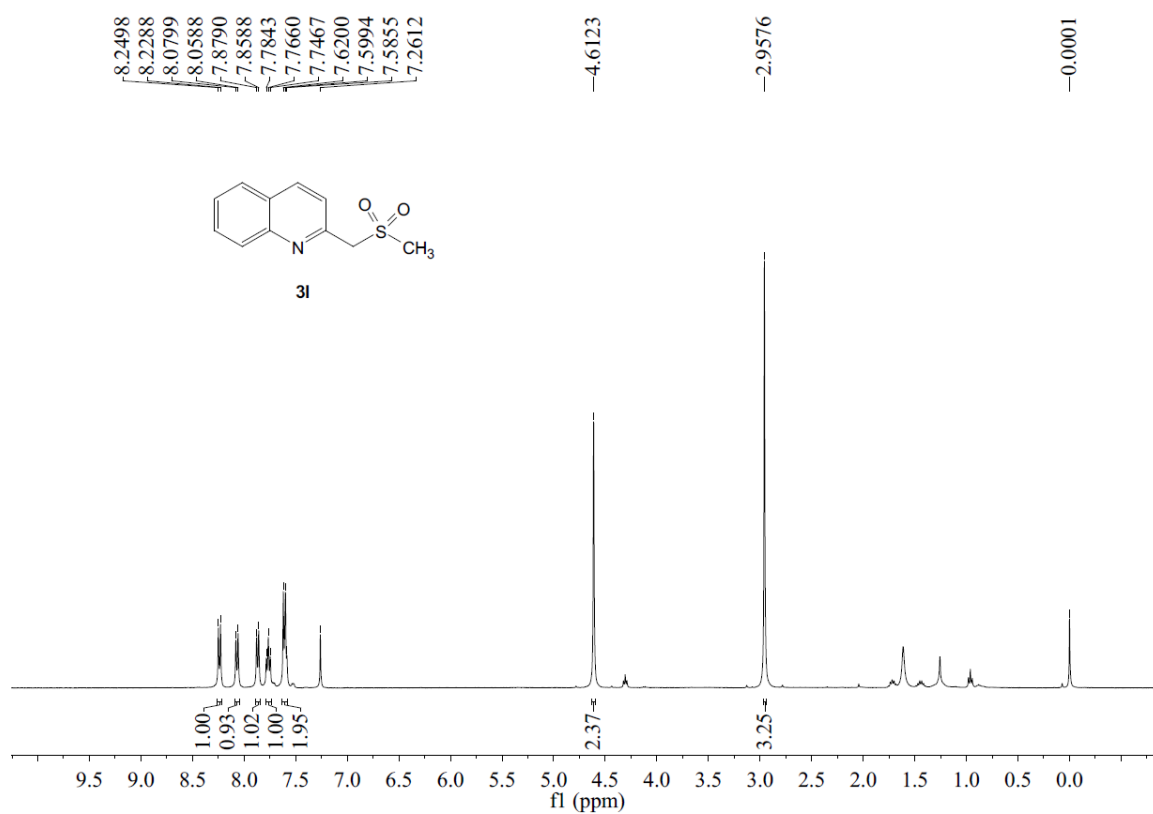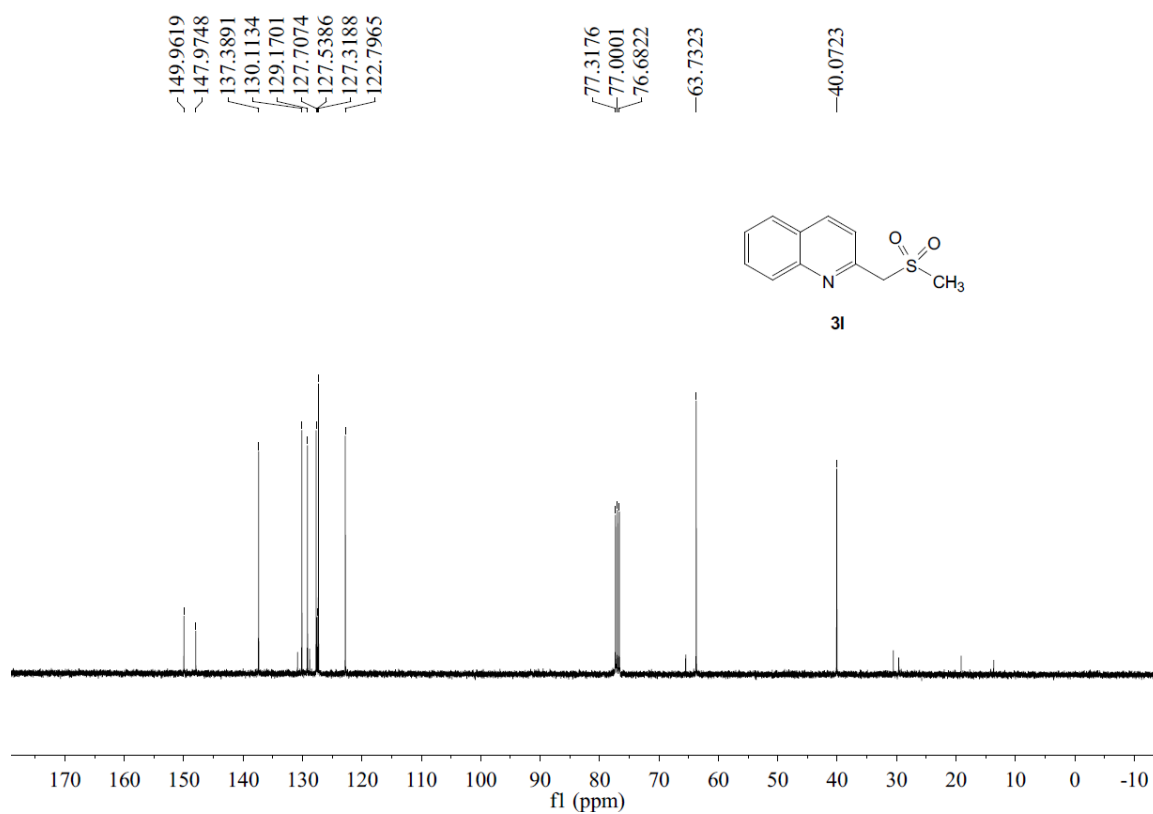

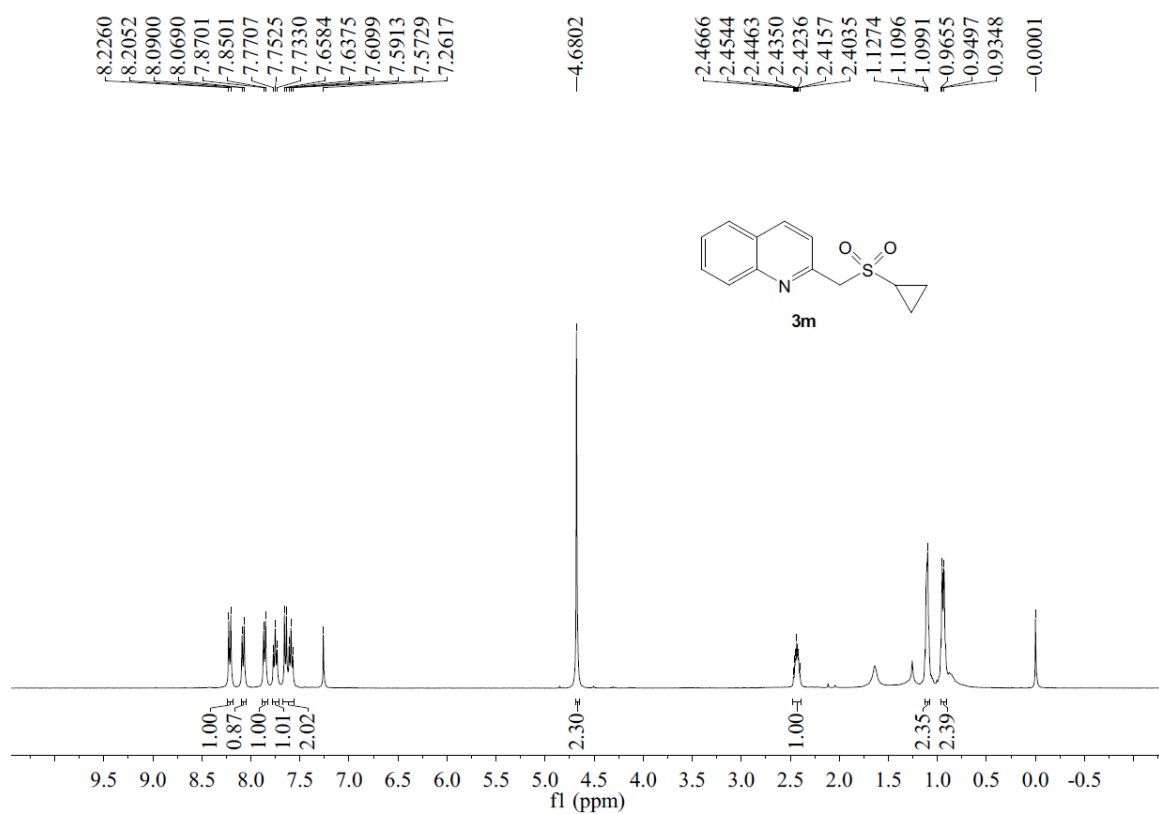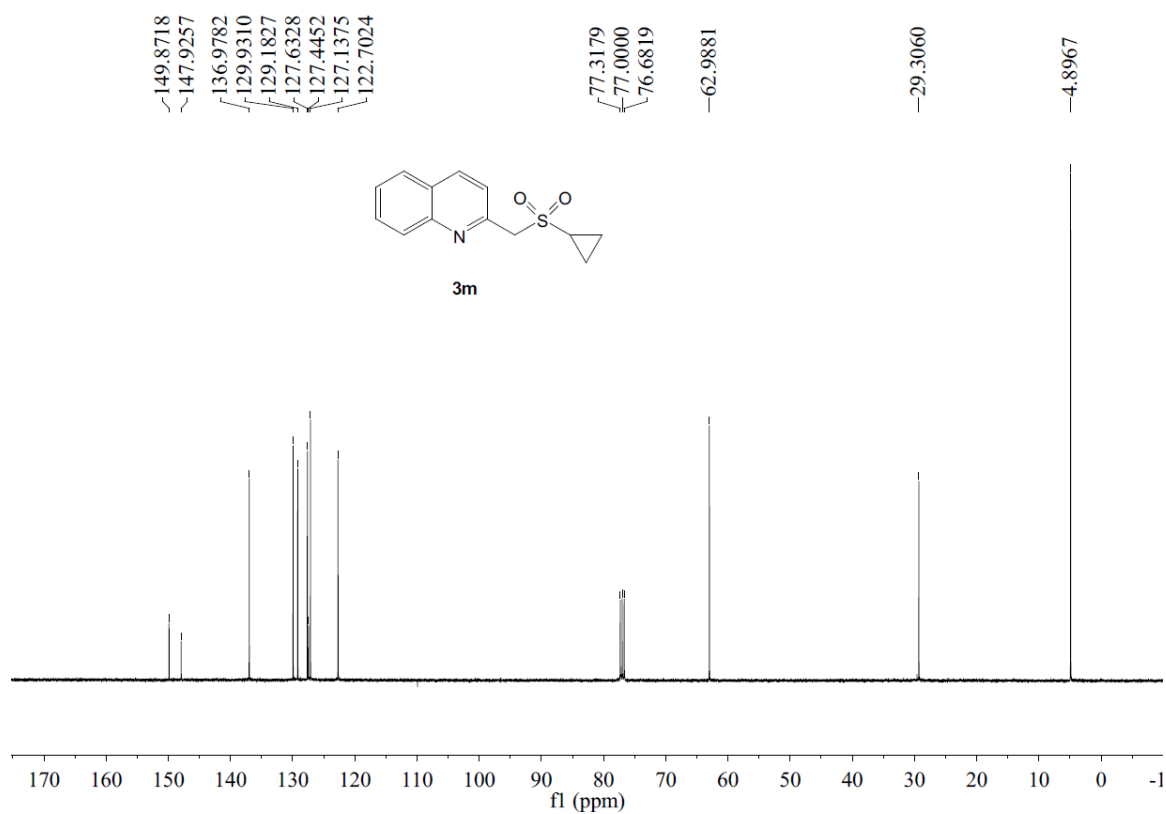

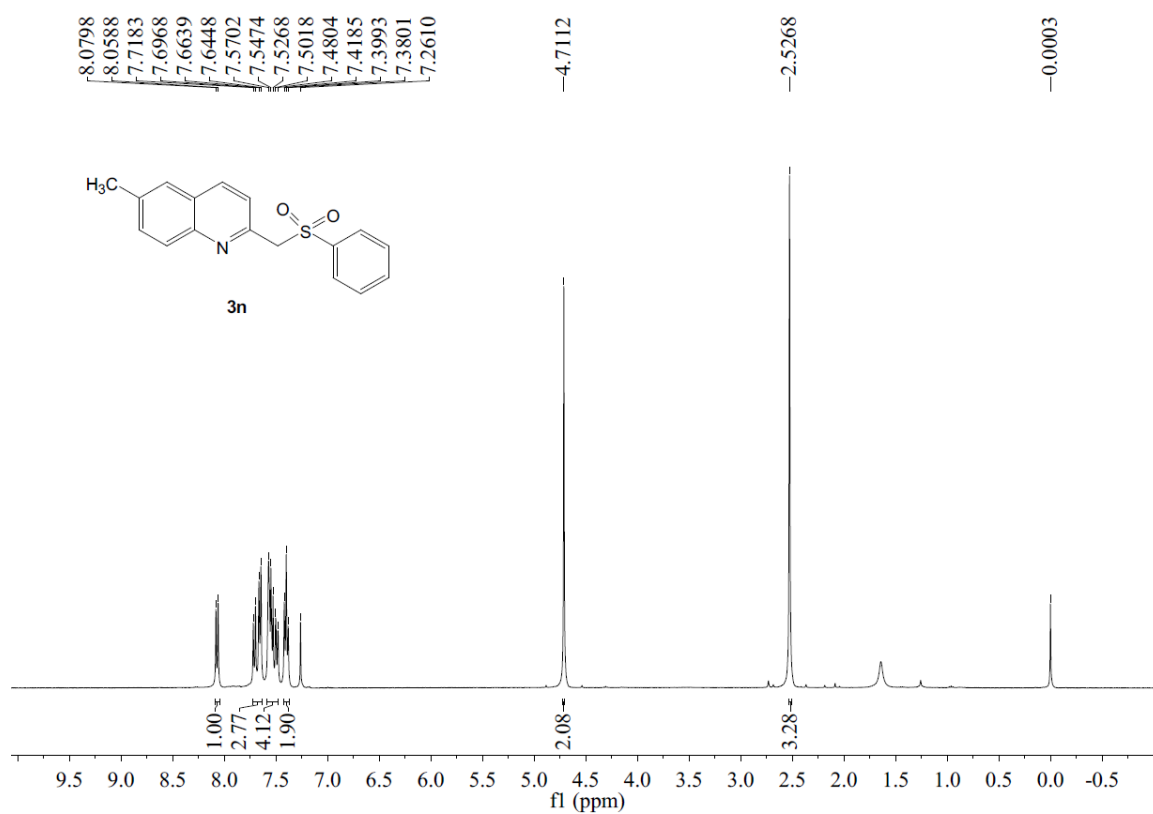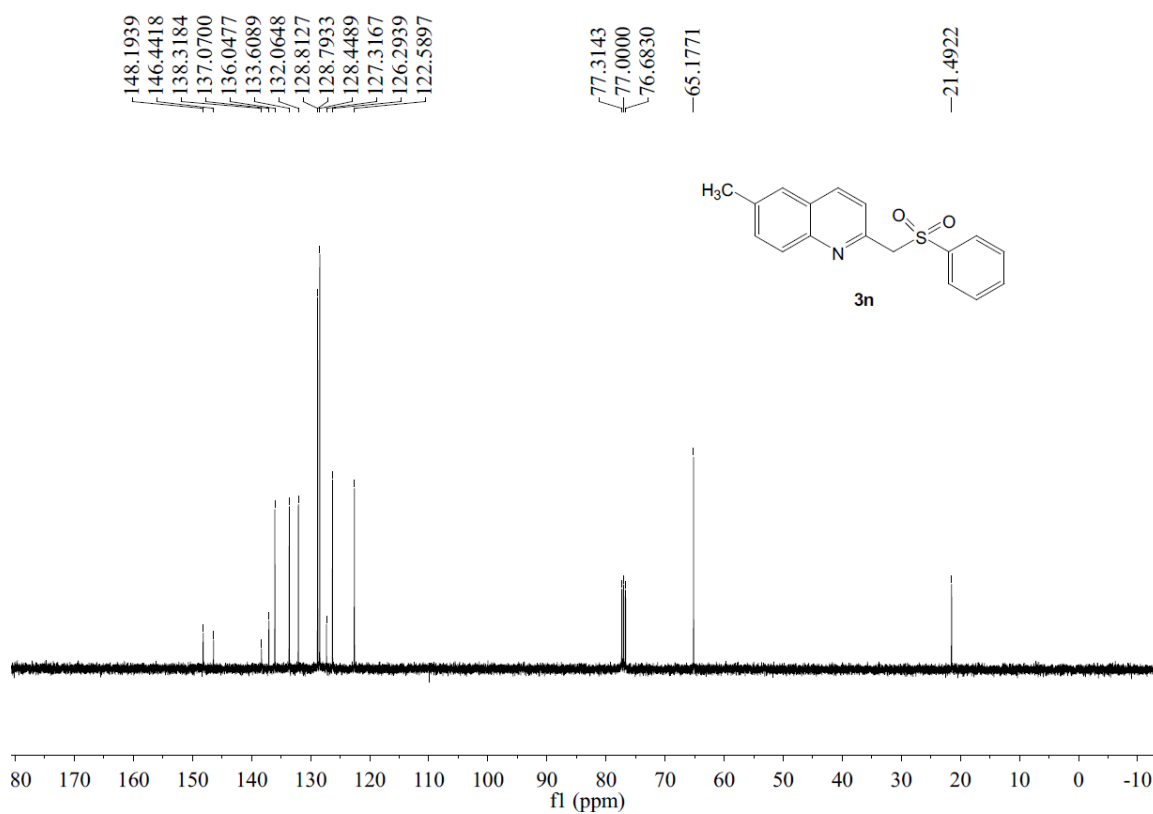

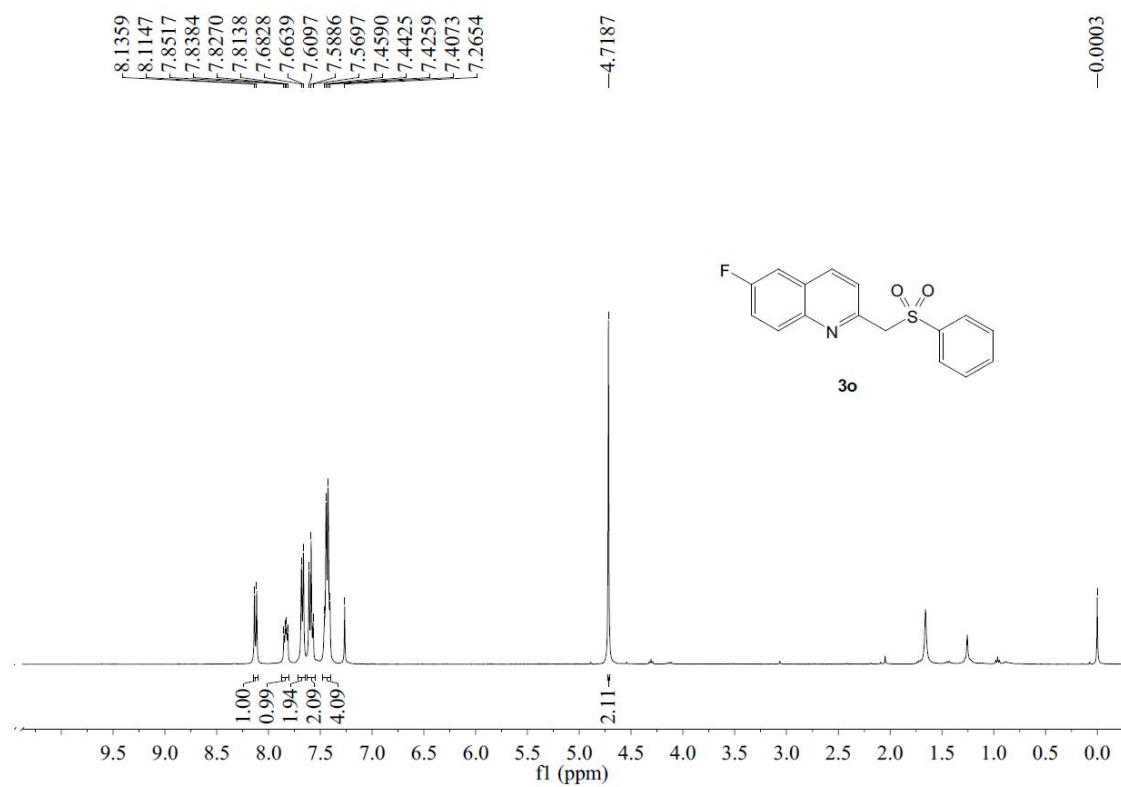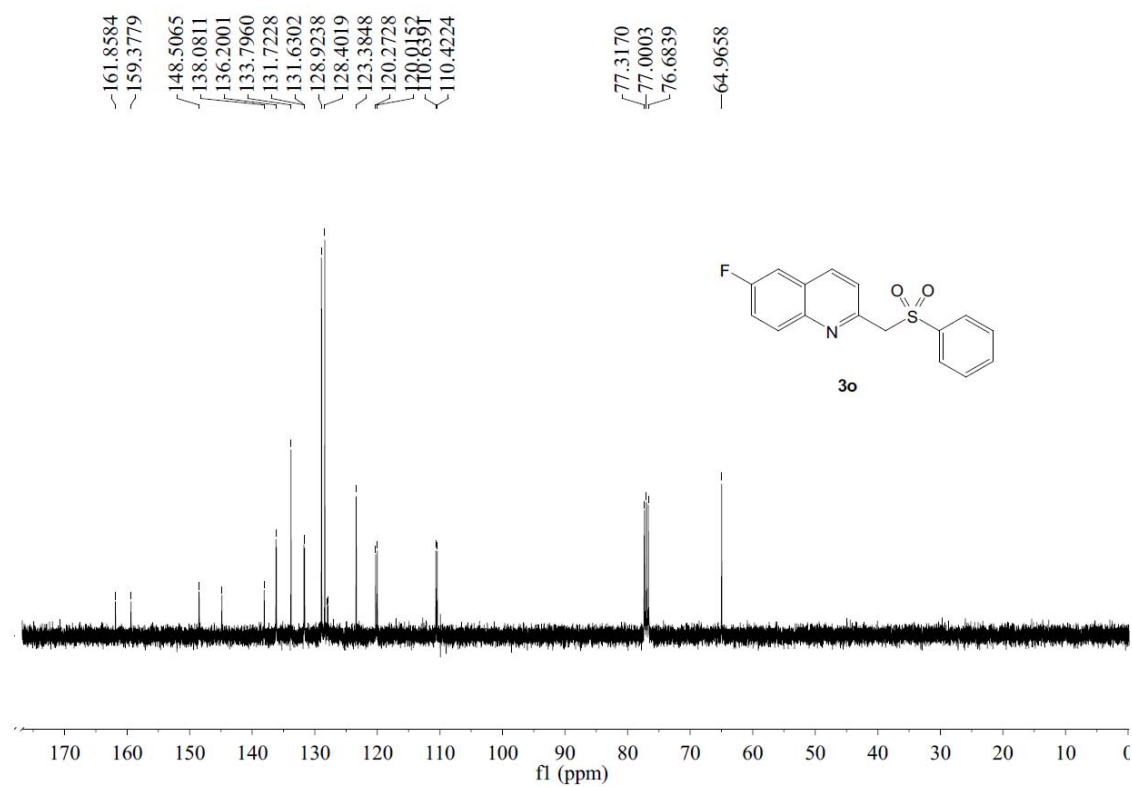

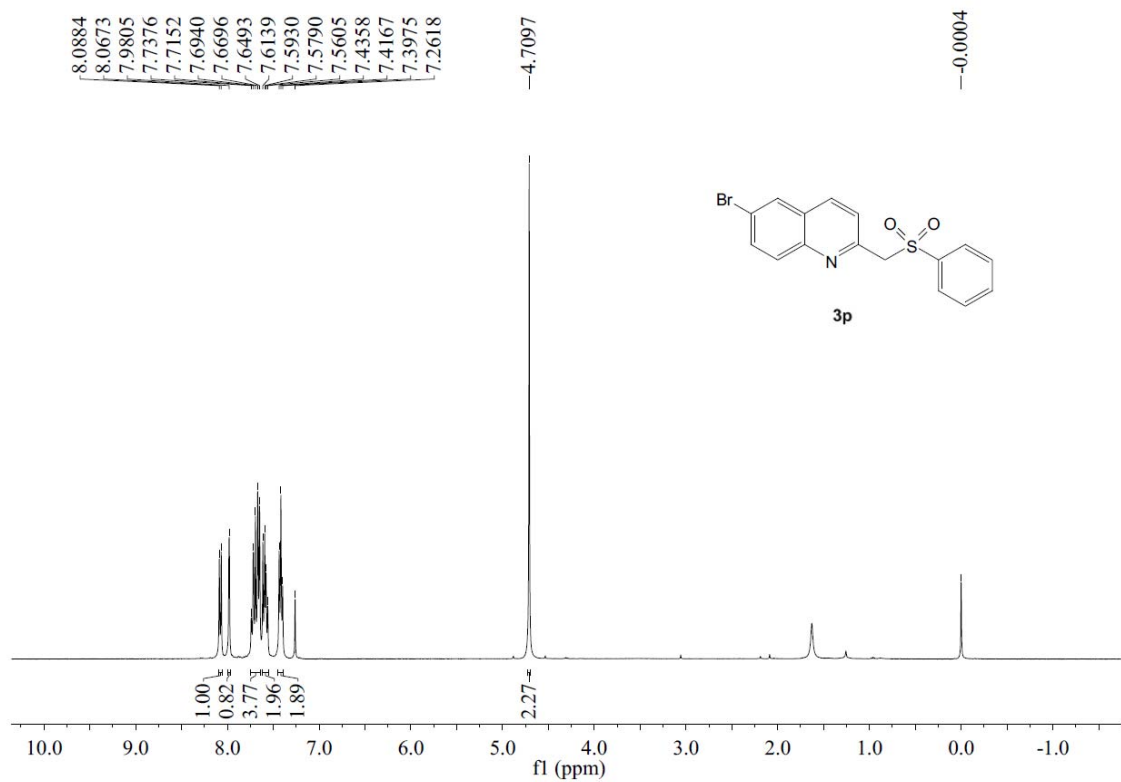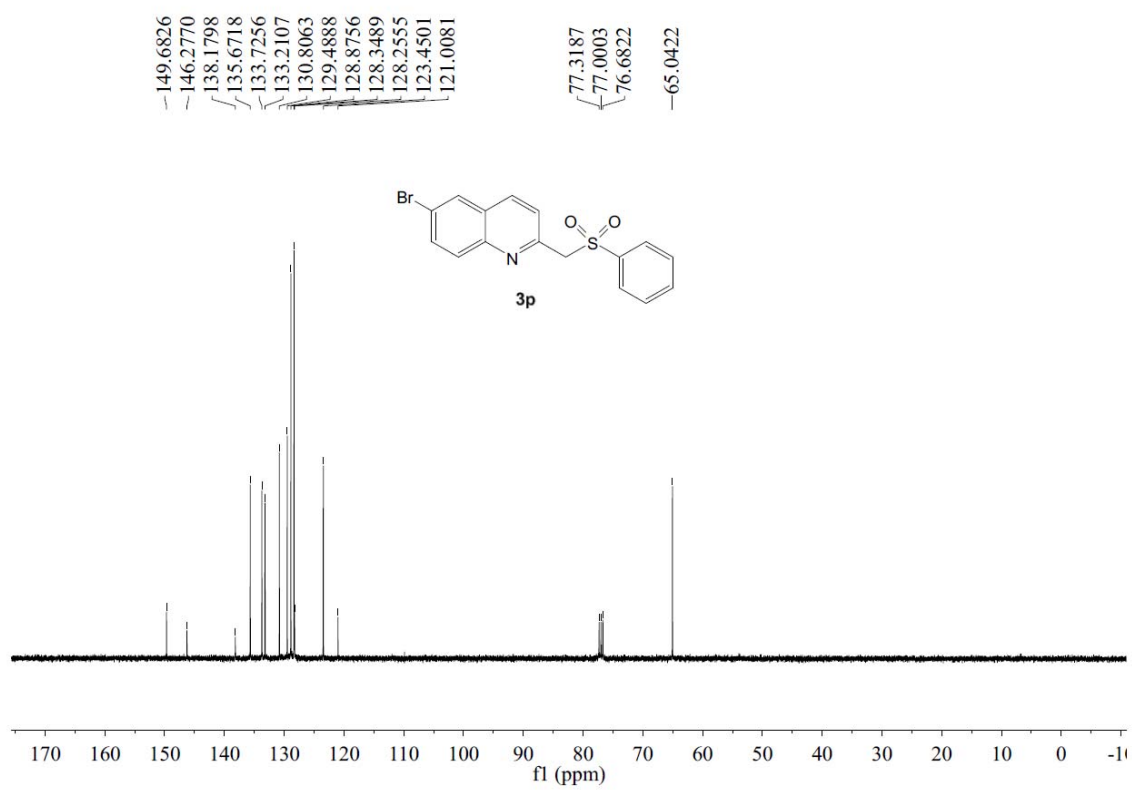

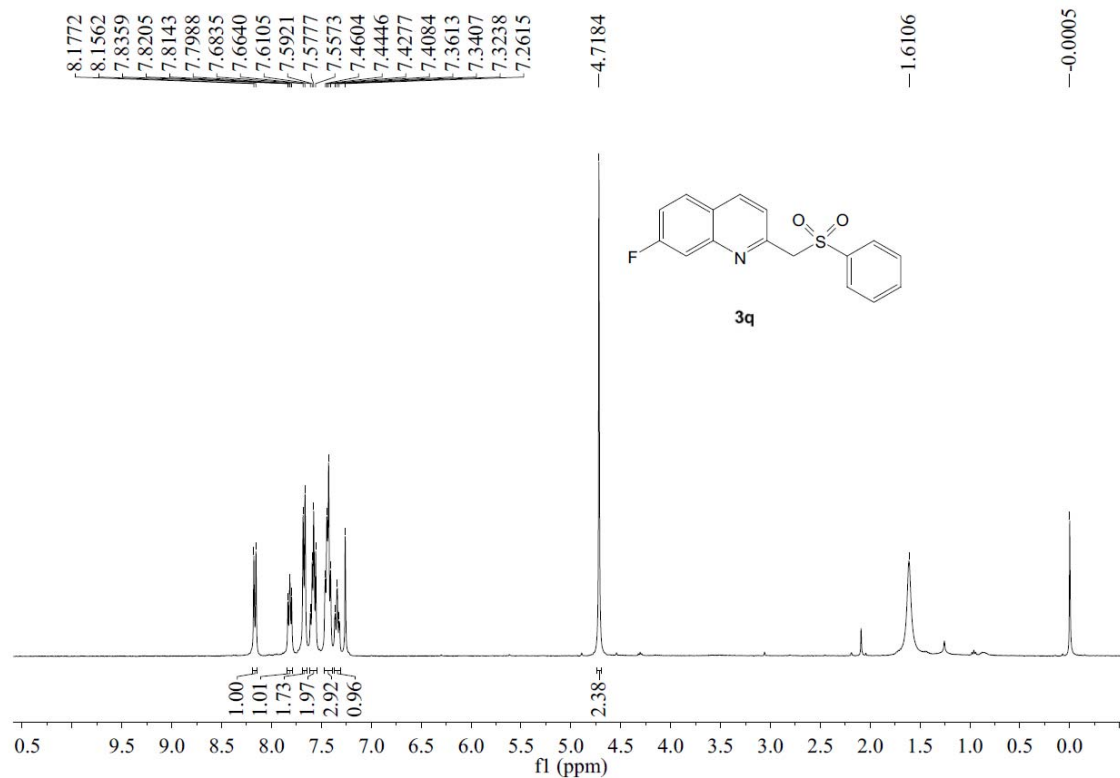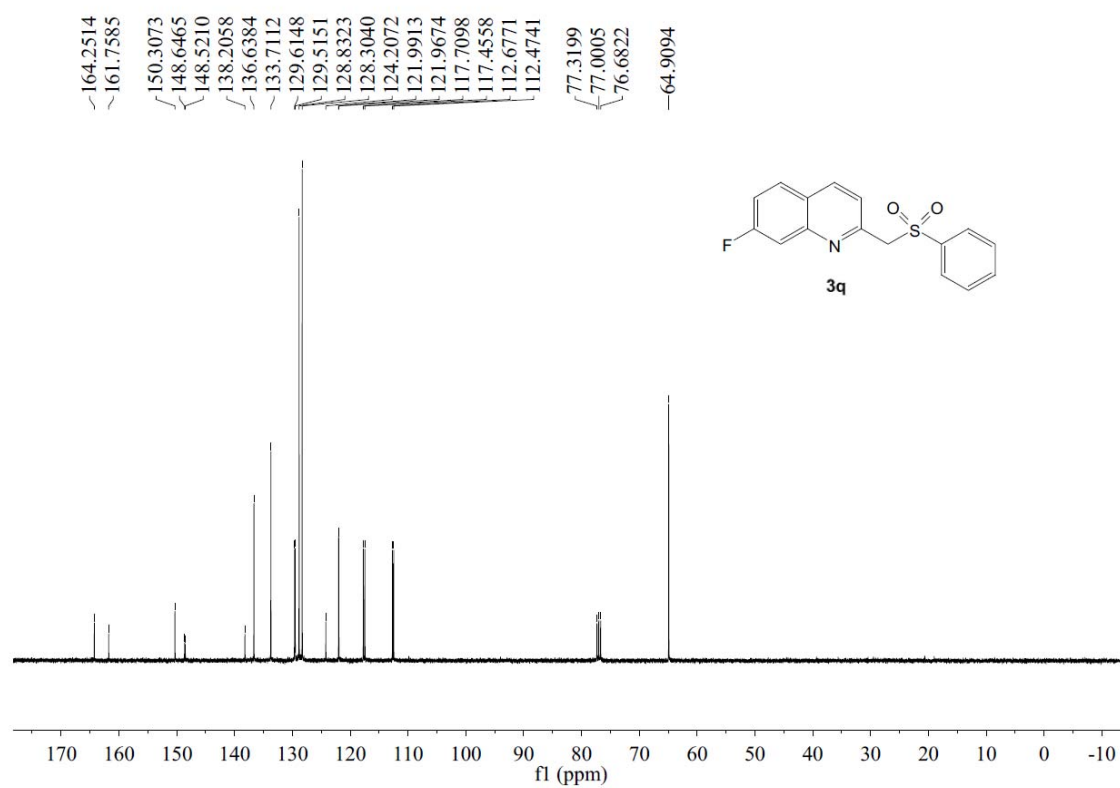

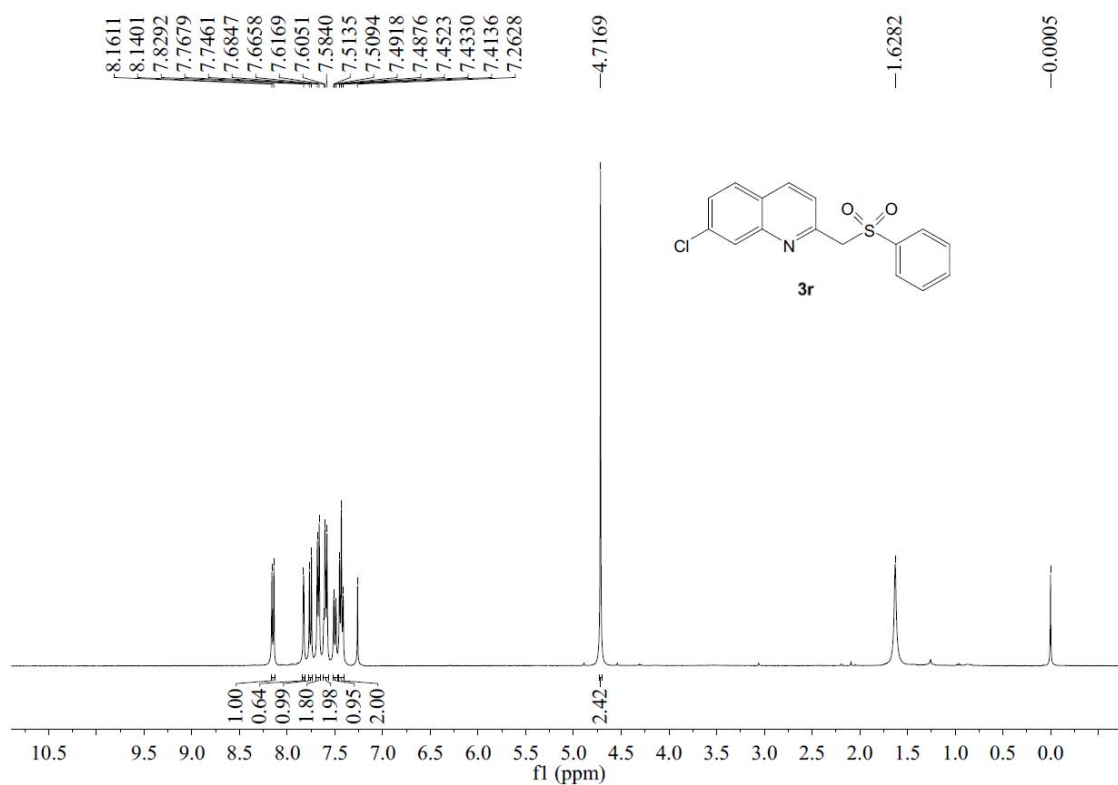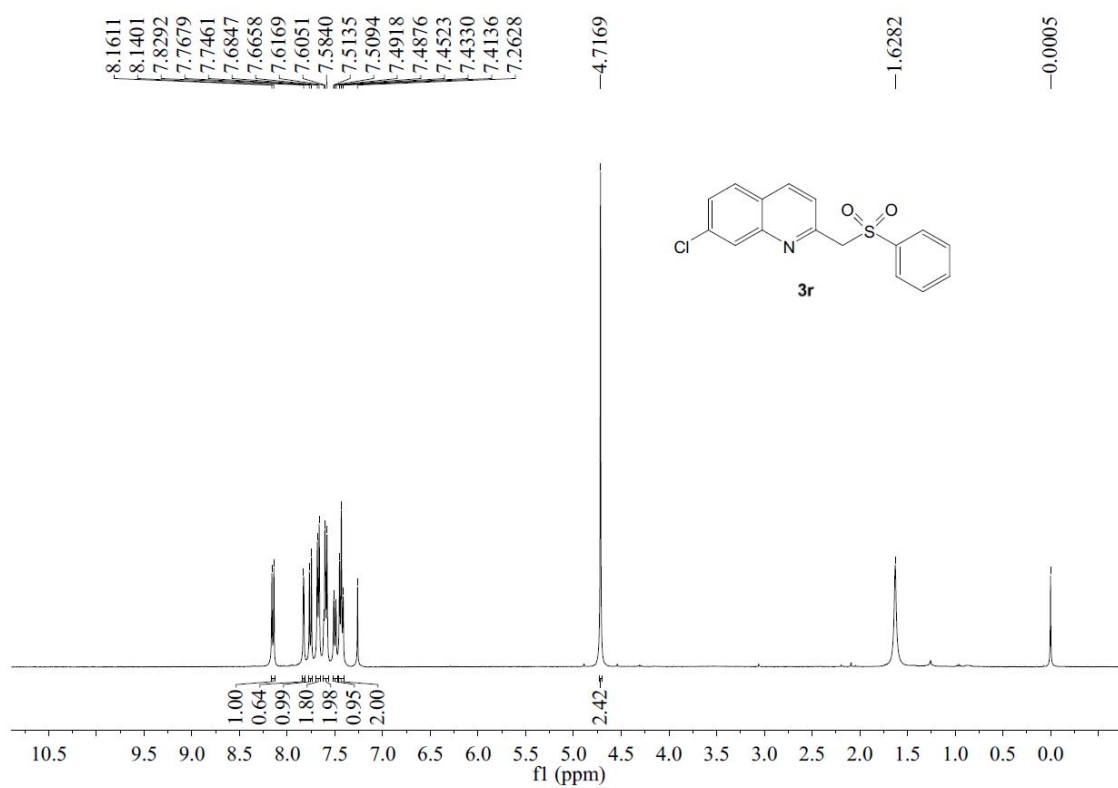



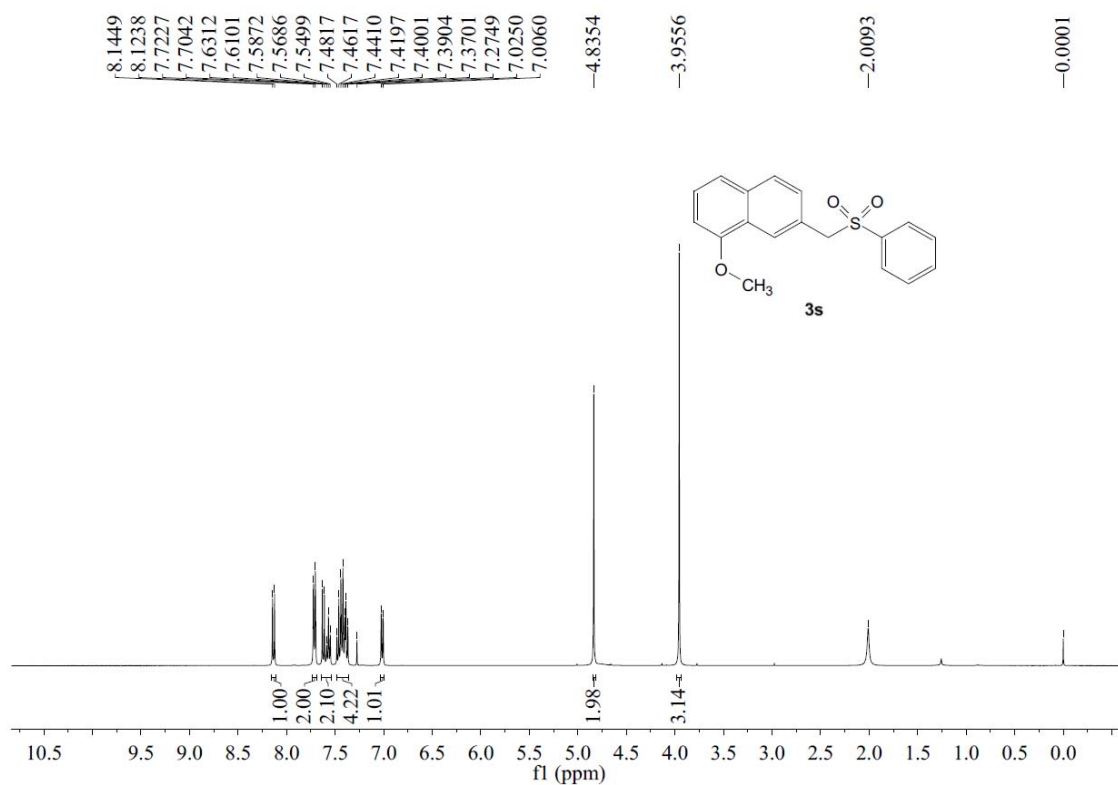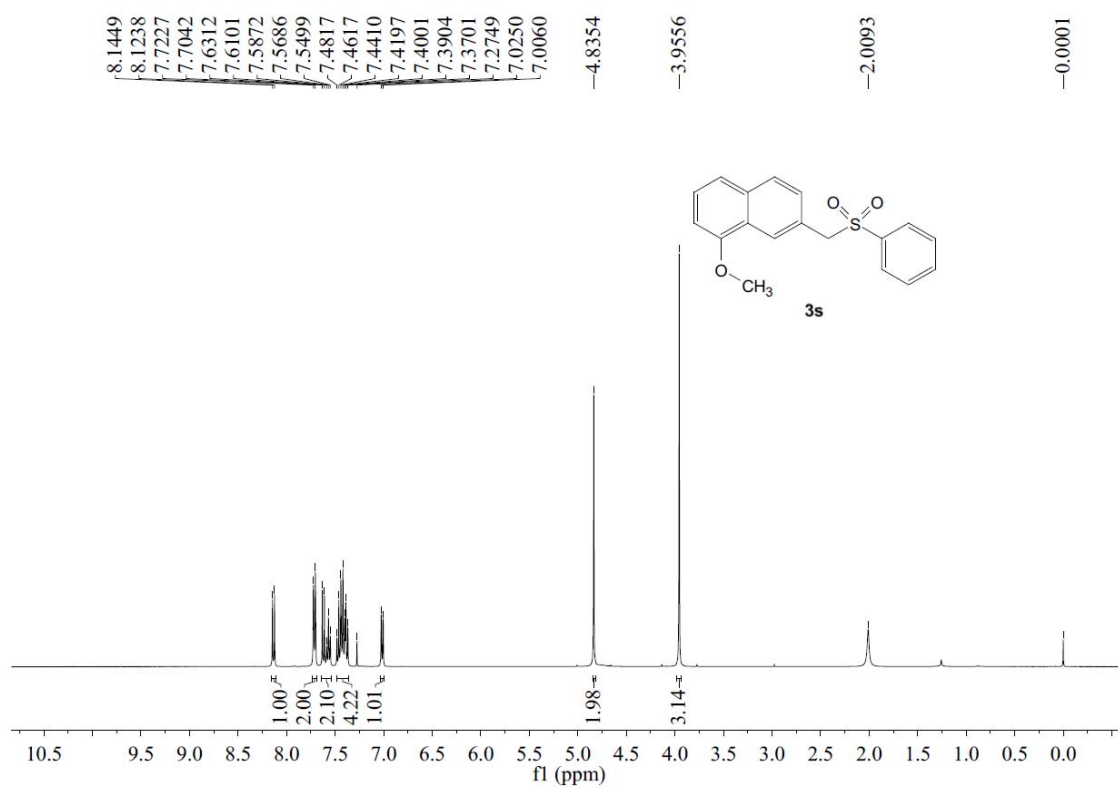

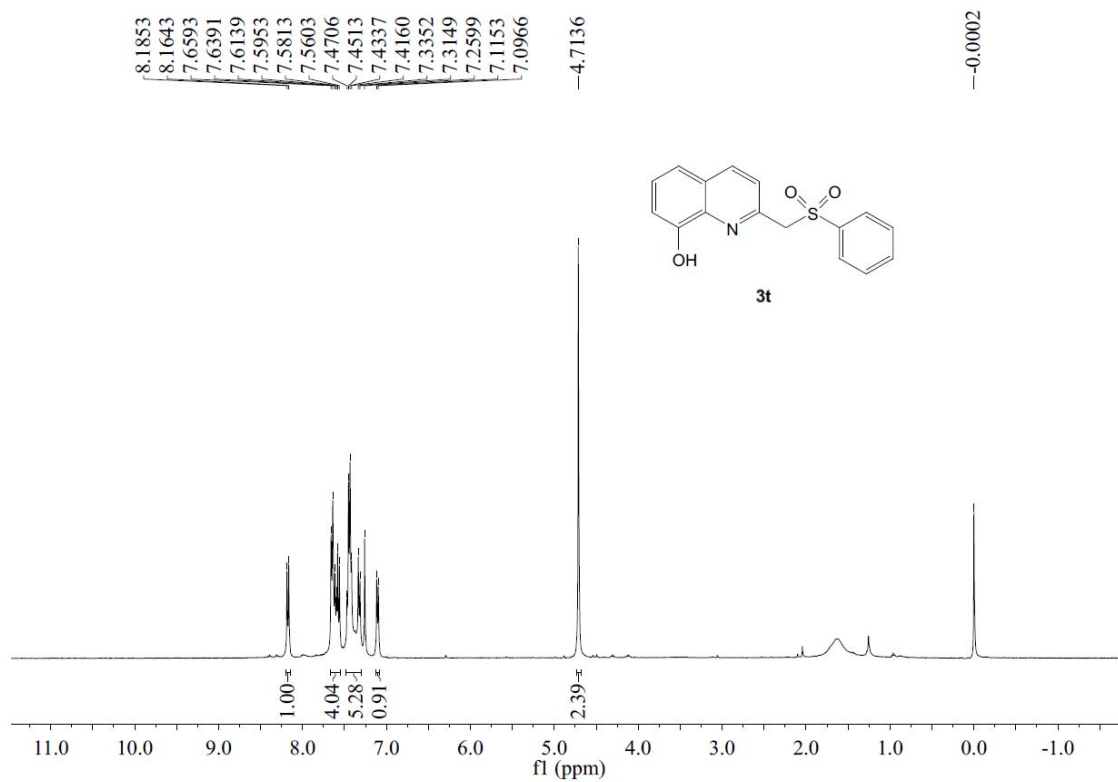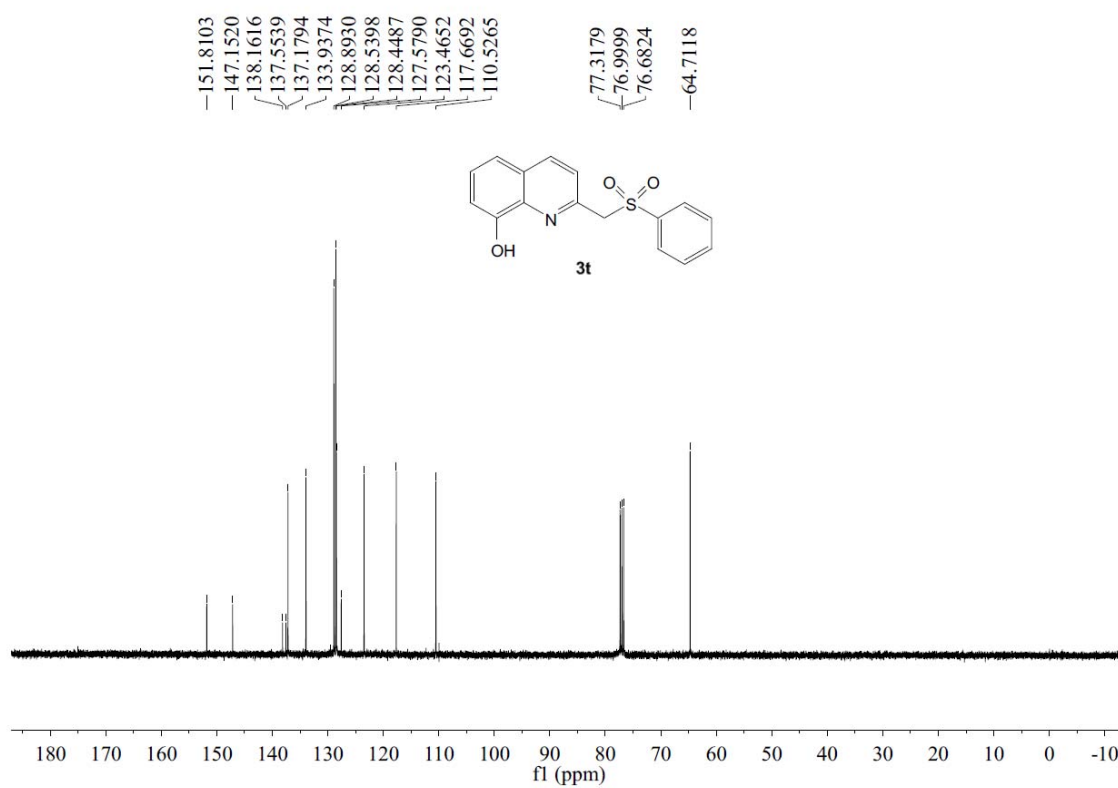

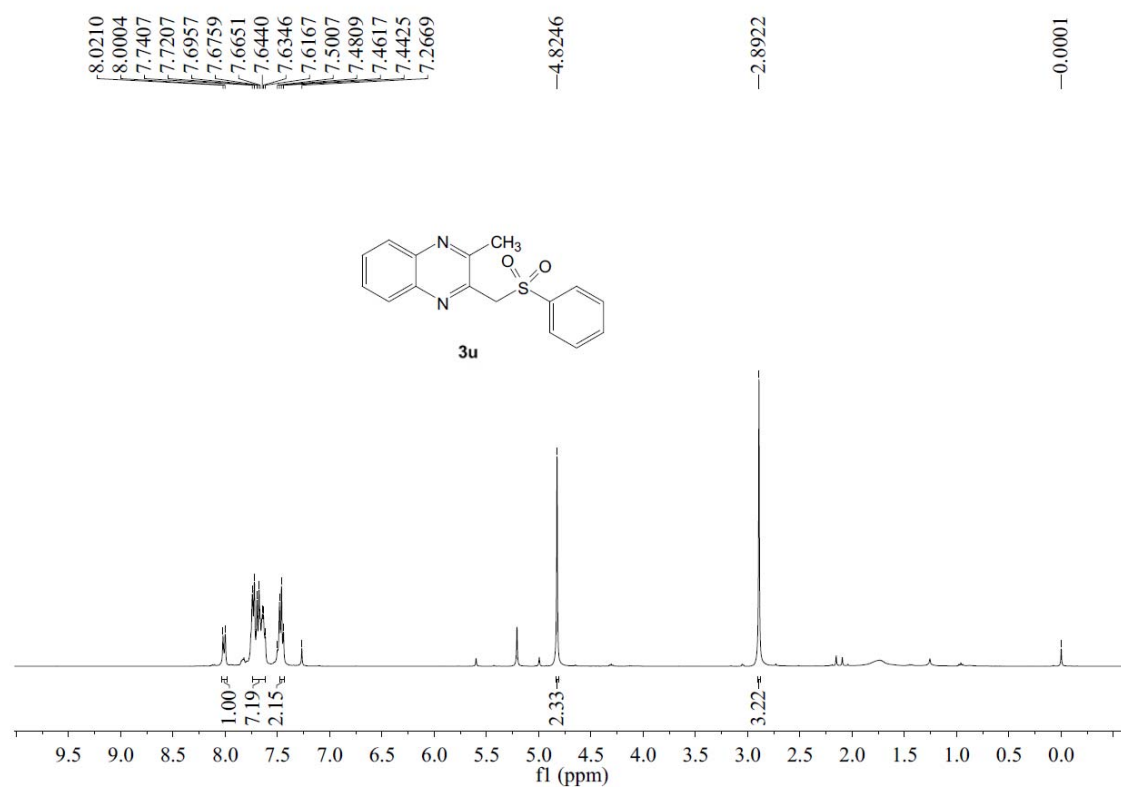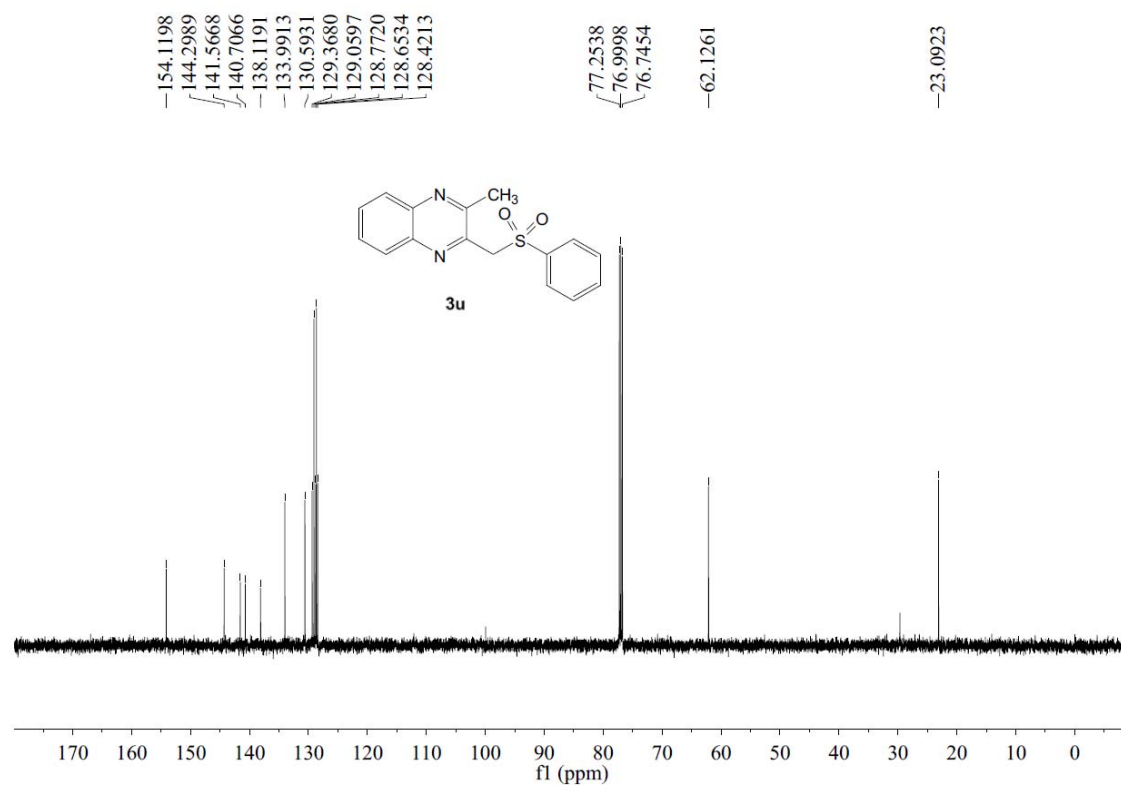

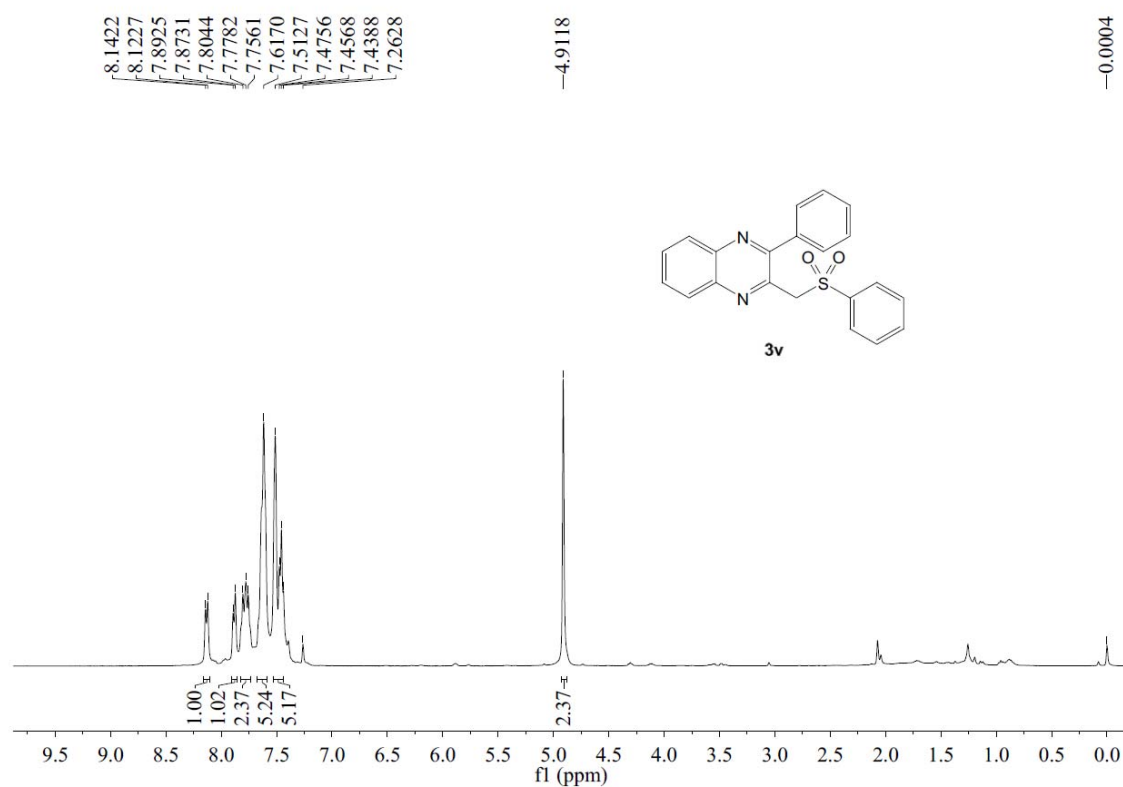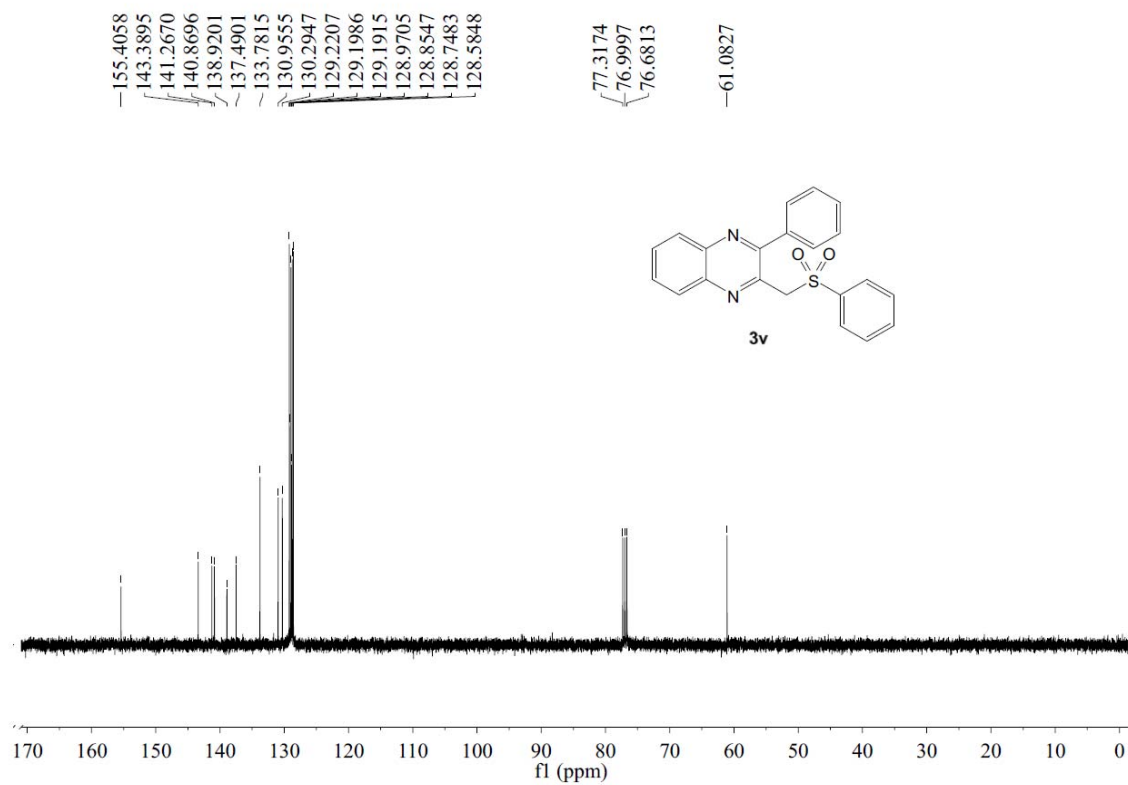

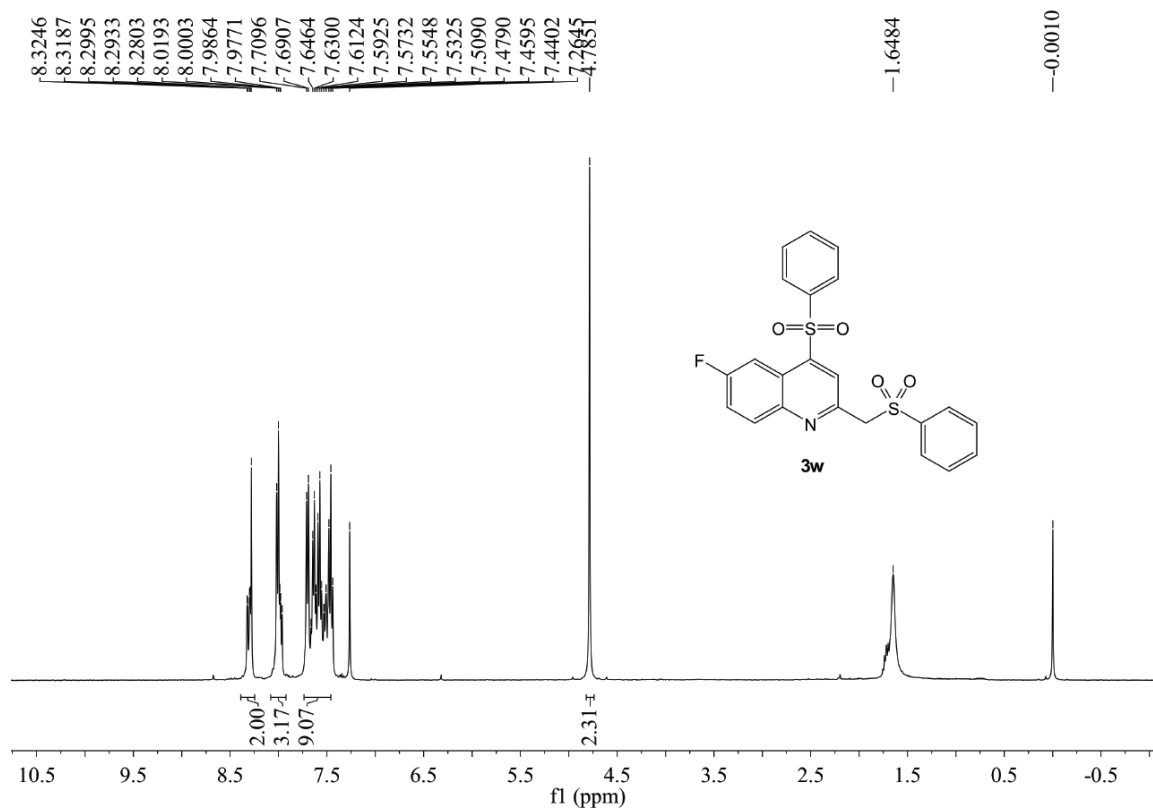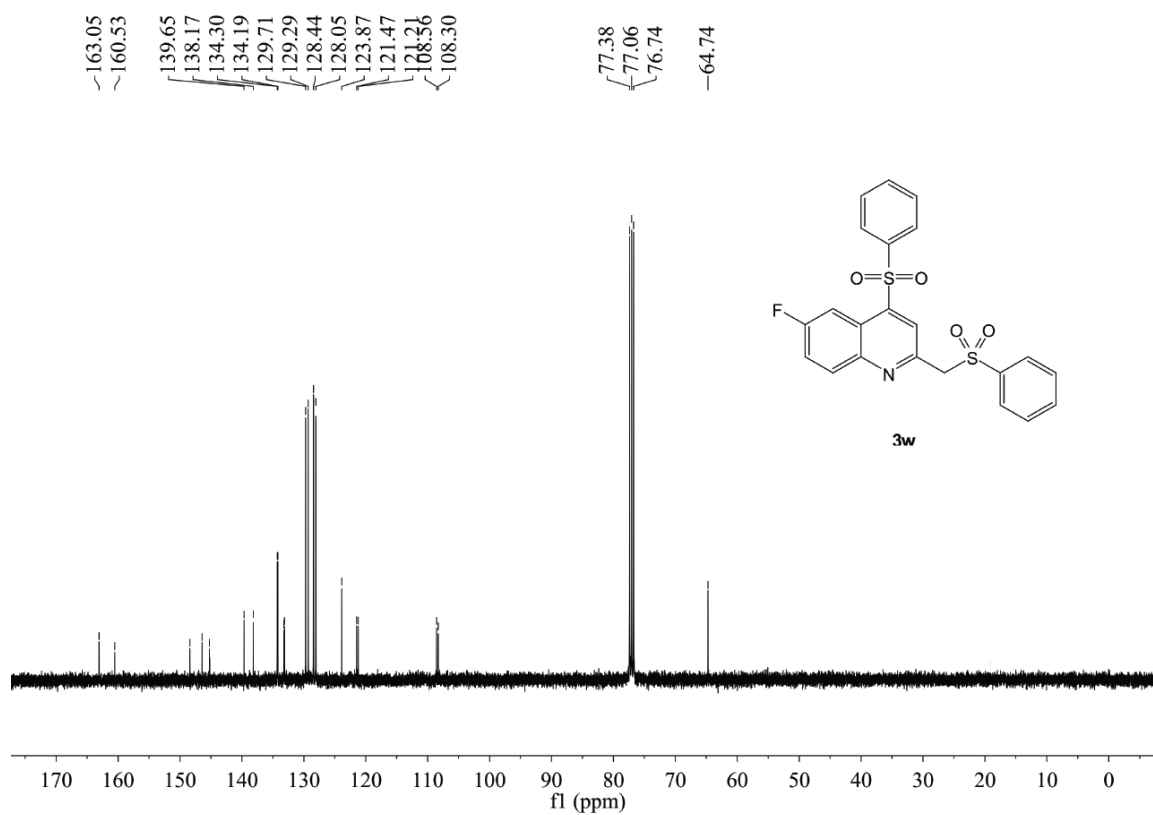

Supplement: c4cc07546c1.pdf [file c4cc07546c1.pdf]
